# Supplementary material for: Global Transcriptomic Analyses Reveal Genes Involved in Conceptus Development During the Implantation Stages in Pigs
Source: Front Genet. 2021 Feb 24;12:584995. doi: 10.3389/fgene.2021.584995 (PMC7943634; doi:10.3389/fgene.2021.584995)
Supplement: Supplementary file 6 [file Table_6.XLSX]

## Sheet: Cluster1
Supplemental Table S6 GO Biological Process enrichment analysis (Cluster1)
Category	Term	Count	%	PValue	Genes	List Total	Pop Hits	Pop Total	Fold Enrichment	Bonferroni	Benjamini	FDR
GOTERM_BP_DIRECT	GO:0006364~rRNA processing	17	0.863382	1.51e-07	ENSSSCT00000002101, ENSSSCT00000018227, ENSSSCT00000018679, ENSSSCT00000015368, ENSSSCT00000015702, ENSSSCT00000012031, ENSSSCT00000003877, ENSSSCT00000006349, ENSSSCT00000023504, ENSSSCT00000028037, ENSSSCT00000003155, ENSSSCT00000032341, ENSSSCT00000032061, ENSSSCT00000022964, ENSSSCT00000014325, ENSSSCT00000010370, ENSSSCT00000011560	1419	31	11368	4.39328	0.000429	0.000429	0.00027
GOTERM_BP_DIRECT	GO:1904874~positive regulation of telomerase RNA localization to Cajal body	11	0.558659	1.77e-07	ENSSSCT00000033158, ENSSSCT00000009094, ENSSSCT00000015328, ENSSSCT00000000535, ENSSSCT00000012605, ENSSSCT00000003499, ENSSSCT00000007106, ENSSSCT00000023076, ENSSSCT00000014017, ENSSSCT00000009172, ENSSSCT00000022242, ENSSSCT00000004476	1419	13	11368	6.77877	0.000504	0.000252	0.000317
GOTERM_BP_DIRECT	GO:0006412~translation	43	2.18385	3.05e-06	ENSSSCT00000027559, ENSSSCT00000018205, ENSSSCT00000027718, ENSSSCT00000005626, ENSSSCT00000009847, ENSSSCT00000029390, ENSSSCT00000003716, ENSSSCT00000030349, ENSSSCT00000014148, ENSSSCT00000005521, ENSSSCT00000035556, ENSSSCT00000006335, ENSSSCT00000018383, ENSSSCT00000014039, ENSSSCT00000012716, ENSSSCT00000009637, ENSSSCT00000028682, ENSSSCT00000015328, ENSSSCT00000024986, ENSSSCT00000032644,…	1419	164	11368	2.10052	0.00864633	0.00289046	0.00546707
GOTERM_BP_DIRECT	GO:0015991~ATP hydrolysis coupled proton transport	15	0.761808	4.3e-06	ENSSSCT00000019098, ENSSSCT00000006862, ENSSSCT00000018941, ENSSSCT00000000831, ENSSSCT00000007385, ENSSSCT00000018047, ENSSSCT00000008828, ENSSSCT00000017392, ENSSSCT00000013040, ENSSSCT00000000438, ENSSSCT00000006643, ENSSSCT00000032060, ENSSSCT00000009446, ENSSSCT00000010525, ENSSSCT00000004971, ENSSSCT00000003074	1419	30	11368	4.00564	0.0121536	0.00305234	0.0076982
GOTERM_BP_DIRECT	GO:1904871~positive regulation of protein localization to Cajal body	7	0.35551	2.33e-05	ENSSSCT00000009094, ENSSSCT00000000535, ENSSSCT00000007106, ENSSSCT00000023076, ENSSSCT00000009172, ENSSSCT00000022242, ENSSSCT00000004476	1419	7	11368	8.01128	0.0642038	0.0131838	0.0417686
GOTERM_BP_DIRECT	GO:0015986~ATP synthesis coupled proton transport	11	0.558659	2.81e-05	ENSSSCT00000019098, ENSSSCT00000018941, ENSSSCT00000007437, ENSSSCT00000025595, ENSSSCT00000014675, ENSSSCT00000013174, ENSSSCT00000017392, ENSSSCT00000032099, ENSSSCT00000000438, ENSSSCT00000004971, ENSSSCT00000018385	1419	19	11368	4.63811	0.0766756	0.0132078	0.0502118
GOTERM_BP_DIRECT	GO:0042273~ribosomal large subunit biogenesis	11	0.558659	4.99e-05	ENSSSCT00000009829, ENSSSCT00000003057, ENSSSCT00000015702, ENSSSCT00000022964, ENSSSCT00000032480, ENSSSCT00000024617, ENSSSCT00000012969, ENSSSCT00000006810, ENSSSCT00000030834, ENSSSCT00000027556, ENSSSCT00000026878	1419	20	11368	4.4062	0.132154	0.0200451	0.0891976
GOTERM_BP_DIRECT	GO:0006606~protein import into nucleus	15	0.761808	5.43e-05	ENSSSCT00000027029, ENSSSCT00000025206, ENSSSCT00000003555, ENSSSCT00000009858, ENSSSCT00000022690, ENSSSCT00000008448, ENSSSCT00000025703, ENSSSCT00000011098, ENSSSCT00000000020, ENSSSCT00000011155, ENSSSCT00000018042, ENSSSCT00000008215, ENSSSCT00000018732, ENSSSCT00000010685, ENSSSCT00000032448	1419	36	11368	3.33803	0.142937	0.0190958	0.0970616
GOTERM_BP_DIRECT	GO:0006457~protein folding	26	1.32047	7.18e-05	ENSSSCT00000001901, ENSSSCT00000000807, ENSSSCT00000026921, ENSSSCT00000006023, ENSSSCT00000005998, ENSSSCT00000009172, ENSSSCT00000009094, ENSSSCT00000001666, ENSSSCT00000027777, ENSSSCT00000015061, ENSSSCT00000003017, ENSSSCT00000007735, ENSSSCT00000017506, ENSSSCT00000000150, ENSSSCT00000007106, ENSSSCT00000017505, ENSSSCT00000023076, ENSSSCT00000008715, ENSSSCT00000025145, ENSSSCT00000015665,…	1419	90	11368	2.31437	0.184748	0.0224397	0.128514
GOTERM_BP_DIRECT	GO:1904851~positive regulation of establishment of protein localization to telomere	7	0.35551	8.34e-05	ENSSSCT00000033158, ENSSSCT00000009094, ENSSSCT00000000535, ENSSSCT00000023076, ENSSSCT00000014017, ENSSSCT00000009172, ENSSSCT00000022242, ENSSSCT00000004476	1419	8	11368	7.00987	0.211192	0.023444	0.149245
GOTERM_BP_DIRECT	GO:0006120~mitochondrial electron transport, NADH to ubiquinone	8	0.406298	0.000207	ENSSSCT00000004081, ENSSSCT00000035108, ENSSSCT00000017804, ENSSSCT00000018632, ENSSSCT00000006760, ENSSSCT00000014850, ENSSSCT00000016243, ENSSSCT00000016824	1419	12	11368	5.34085	0.445066	0.052129	0.370076
GOTERM_BP_DIRECT	GO:0030150~protein import into mitochondrial matrix	8	0.406298	0.0004	ENSSSCT00000023429, ENSSSCT00000027777, ENSSSCT00000028028, ENSSSCT00000003427, ENSSSCT00000014843, ENSSSCT00000016759, ENSSSCT00000000103, ENSSSCT00000005378	1419	13	11368	4.93002	0.679783	0.0905328	0.714373
GOTERM_BP_DIRECT	GO:0045454~cell redox homeostasis	16	0.812595	0.000502	ENSSSCT00000000150, ENSSSCT00000004279, ENSSSCT00000002390, ENSSSCT00000028213, ENSSSCT00000002774, ENSSSCT00000005998, ENSSSCT00000005553, ENSSSCT00000001056, ENSSSCT00000027740, ENSSSCT00000006195, ENSSSCT00000004329, ENSSSCT00000011683, ENSSSCT00000014243, ENSSSCT00000000917, ENSSSCT00000033313, ENSSSCT00000016824	1419	48	11368	2.67043	0.760434	0.104092	0.895587
GOTERM_BP_DIRECT	GO:1903364~positive regulation of cellular protein catabolic process	6	0.304723	0.000507	ENSSSCT00000027029, ENSSSCT00000034426, ENSSSCT00000009562, ENSSSCT00000013522, ENSSSCT00000016377, ENSSSCT00000033964	1419	7	11368	6.86681	0.763199	0.0977786	0.902831
GOTERM_BP_DIRECT	GO:0006335~DNA replication-dependent nucleosome assembly	8	0.406298	0.000715	ENSSSCT00000002238, ENSSSCT00000031617, ENSSSCT00000015047, ENSSSCT00000026997, ENSSSCT00000023667, ENSSSCT00000029000, ENSSSCT00000030653, ENSSSCT00000001265	1419	14	11368	4.57787	0.86909	0.126764	1.27193
GOTERM_BP_DIRECT	GO:0006897~endocytosis	19	0.964957	0.000903	ENSSSCT00000028797, ENSSSCT00000004106, ENSSSCT00000006862, ENSSSCT00000005033, ENSSSCT00000009130, ENSSSCT00000004078, ENSSSCT00000024360, ENSSSCT00000028507, ENSSSCT00000006017, ENSSSCT00000007909, ENSSSCT00000032060, ENSSSCT00000014228, ENSSSCT00000000996, ENSSSCT00000014804, ENSSSCT00000007760, ENSSSCT00000029153, ENSSSCT00000006256, ENSSSCT00000004847, ENSSSCT00000004948, ENSSSCT00000030585	1419	66	11368	2.30628	0.923325	0.148292	1.60387
GOTERM_BP_DIRECT	GO:0006400~tRNA modification	7	0.35551	0.000985	ENSSSCT00000013035, ENSSSCT00000014892, ENSSSCT00000018562, ENSSSCT00000004570, ENSSSCT00000001906, ENSSSCT00000003017, ENSSSCT00000025877	1419	11	11368	5.09808	0.939229	0.151889	1.74777
GOTERM_BP_DIRECT	GO:0032981~mitochondrial respiratory chain complex I assembly	7	0.35551	0.000985	ENSSSCT00000023990, ENSSSCT00000023318, ENSSSCT00000005378, ENSSSCT00000006684, ENSSSCT00000004798, ENSSSCT00000007747, ENSSSCT00000027544	1419	11	11368	5.09808	0.939229	0.151889	1.74777
GOTERM_BP_DIRECT	GO:0051290~protein heterotetramerization	7	0.35551	0.000985	ENSSSCT00000024393, ENSSSCT00000031617, ENSSSCT00000026997, ENSSSCT00000023667, ENSSSCT00000029000, ENSSSCT00000030653, ENSSSCT00000001265	1419	11	11368	5.09808	0.939229	0.151889	1.74777
GOTERM_BP_DIRECT	GO:0000462~maturation of SSU-rRNA from tricistronic rRNA transcript (SSU-rRNA, 5.8S rRNA, LSU-rRNA)	11	0.558659	0.000998	ENSSSCT00000025035, ENSSSCT00000001677, ENSSSCT00000007369, ENSSSCT00000019154, ENSSSCT00000011107, ENSSSCT00000005626, ENSSSCT00000011306, ENSSSCT00000028839, ENSSSCT00000010678, ENSSSCT00000023558, ENSSSCT00000002259	1419	27	11368	3.26385	0.941568	0.145955	1.77204
GOTERM_BP_DIRECT	GO:0071035~nuclear polyadenylation-dependent rRNA catabolic process	5	0.253936	0.00108591	ENSSSCT00000003785, ENSSSCT00000006273, ENSSSCT00000005895, ENSSSCT00000009962, ENSSSCT00000035976	1419	5	11368	8.01128	0.954448	0.150047	1.92592
GOTERM_BP_DIRECT	GO:0000463~maturation of LSU-rRNA from tricistronic rRNA transcript (SSU-rRNA, 5.8S rRNA, LSU-rRNA)	6	0.304723	0.00121178	ENSSSCT00000027250, ENSSSCT00000017547, ENSSSCT00000010967, ENSSSCT00000004857, ENSSSCT00000006500, ENSSSCT00000018820	1419	8	11368	6.00846	0.968165	0.158323	2.14689
GOTERM_BP_DIRECT	GO:0055114~oxidation-reduction process	31	1.5744	0.0013408	ENSSSCT00000031745, ENSSSCT00000028213, ENSSSCT00000012189, ENSSSCT00000011189, ENSSSCT00000005998, ENSSSCT00000012045, ENSSSCT00000030509, ENSSSCT00000027131, ENSSSCT00000015570, ENSSSCT00000000148, ENSSSCT00000001051, ENSSSCT00000030694, ENSSSCT00000034561, ENSSSCT00000015429, ENSSSCT00000000917, ENSSSCT00000004920, ENSSSCT00000007527, ENSSSCT00000016824, ENSSSCT00000022820, ENSSSCT00000008478,…	1419	137	11368	1.81277	0.97795	0.166099	2.37289
GOTERM_BP_DIRECT	GO:0016050~vesicle organization	8	0.406298	0.00190018	ENSSSCT00000003153, ENSSSCT00000004506, ENSSSCT00000005033, ENSSSCT00000007760, ENSSSCT00000004847, ENSSSCT00000024360, ENSSSCT00000006017, ENSSSCT00000030585	1419	16	11368	4.00564	0.995516	0.217912	3.34706
GOTERM_BP_DIRECT	GO:0042407~cristae formation	6	0.304723	0.00244677	ENSSSCT00000033698, ENSSSCT00000033489, ENSSSCT00000014771, ENSSSCT00000018015, ENSSSCT00000035731, ENSSSCT00000025900	1419	9	11368	5.34085	0.999055	0.261262	4.29007
GOTERM_BP_DIRECT	GO:0006336~DNA replication-independent nucleosome assembly	7	0.35551	0.00292923	ENSSSCT00000002238, ENSSSCT00000031617, ENSSSCT00000015047, ENSSSCT00000026997, ENSSSCT00000011023, ENSSSCT00000023667, ENSSSCT00000029000	1419	13	11368	4.31376	0.999761	0.293548	5.11523
GOTERM_BP_DIRECT	GO:0034475~U4 snRNA 3'-end processing	5	0.253936	0.00293491	ENSSSCT00000006273, ENSSSCT00000005895, ENSSSCT00000006505, ENSSSCT00000009962, ENSSSCT00000035976	1419	6	11368	6.67606	0.999765	0.284124	5.1249
GOTERM_BP_DIRECT	GO:0050821~protein stabilization	20	1.01574	0.00326473	ENSSSCT00000010474, ENSSSCT00000007106, ENSSSCT00000006855, ENSSSCT00000009130, ENSSSCT00000017505, ENSSSCT00000019103, ENSSSCT00000013783, ENSSSCT00000035028, ENSSSCT00000023076, ENSSSCT00000032929, ENSSSCT00000009172, ENSSSCT00000022242, ENSSSCT00000003711, ENSSSCT00000009094, ENSSSCT00000014874, ENSSSCT00000013985, ENSSSCT00000024309, ENSSSCT00000031403, ENSSSCT00000000535, ENSSSCT00000009925,…	1419	79	11368	2.02817	0.999908	0.300626	5.68508
GOTERM_BP_DIRECT	GO:0042254~ribosome biogenesis	9	0.457085	0.00365018	ENSSSCT00000019257, ENSSSCT00000006300, ENSSSCT00000027317, ENSSSCT00000028168, ENSSSCT00000022770, ENSSSCT00000035204, ENSSSCT00000023947, ENSSSCT00000012529, ENSSSCT00000026152	1419	22	11368	3.27734	0.999969	0.319586	6.33577
GOTERM_BP_DIRECT	GO:0032543~mitochondrial translation	9	0.457085	0.00365018	ENSSSCT00000034469, ENSSSCT00000001849, ENSSSCT00000009874, ENSSSCT00000012874, ENSSSCT00000008496, ENSSSCT00000011270, ENSSSCT00000001889, ENSSSCT00000004835, ENSSSCT00000015705	1419	22	11368	3.27734	0.999969	0.319586	6.33577
GOTERM_BP_DIRECT	GO:0000387~spliceosomal snRNP assembly	8	0.406298	0.00421937	ENSSSCT00000023057, ENSSSCT00000031595, ENSSSCT00000000979, ENSSSCT00000009284, ENSSSCT00000018581, ENSSSCT00000027720, ENSSSCT00000004100, ENSSSCT00000011019	1419	18	11368	3.56057	0.999994	0.34905	7.2889
GOTERM_BP_DIRECT	GO:0006405~RNA export from nucleus	7	0.35551	0.00458996	ENSSSCT00000011098, ENSSSCT00000003555, ENSSSCT00000011155, ENSSSCT00000007791, ENSSSCT00000009858, ENSSSCT00000008215, ENSSSCT00000008448	1419	14	11368	4.00564	0.999998	0.363015	7.90453
GOTERM_BP_DIRECT	GO:0009060~aerobic respiration	8	0.406298	0.00597122	ENSSSCT00000006815, ENSSSCT00000014528, ENSSSCT00000014099, ENSSSCT00000008595, ENSSSCT00000031506, ENSSSCT00000027692, ENSSSCT00000004603, ENSSSCT00000012433	1419	19	11368	3.37317	1	0.433098	10.1653
GOTERM_BP_DIRECT	GO:0034427~nuclear-transcribed mRNA catabolic process, exonucleolytic, 3'-5'	5	0.253936	0.00617269	ENSSSCT00000006273, ENSSSCT00000005895, ENSSSCT00000006505, ENSSSCT00000009962, ENSSSCT00000035976	1419	7	11368	5.72234	1	0.433257	10.4906
GOTERM_BP_DIRECT	GO:0032212~positive regulation of telomere maintenance via telomerase	9	0.457085	0.00668575	ENSSSCT00000033158, ENSSSCT00000009094, ENSSSCT00000000535, ENSSSCT00000007106, ENSSSCT00000016997, ENSSSCT00000023076, ENSSSCT00000014017, ENSSSCT00000009172, ENSSSCT00000022242, ENSSSCT00000004476	1419	24	11368	3.00423	1	0.448979	11.3141
GOTERM_BP_DIRECT	GO:0071034~CUT catabolic process	4	0.203149	0.00702518	ENSSSCT00000003785, ENSSSCT00000006273, ENSSSCT00000005895, ENSSSCT00000010370	1419	4	11368	8.01128	1	0.455216	11.855
GOTERM_BP_DIRECT	GO:0071038~nuclear polyadenylation-dependent tRNA catabolic process	4	0.203149	0.00702518	ENSSSCT00000006273, ENSSSCT00000005895, ENSSSCT00000009962, ENSSSCT00000035976	1419	4	11368	8.01128	1	0.455216	11.855
GOTERM_BP_DIRECT	GO:0022904~respiratory electron transport chain	6	0.304723	0.00723372	ENSSSCT00000001056, ENSSSCT00000031745, ENSSSCT00000025662, ENSSSCT00000029467, ENSSSCT00000034561, ENSSSCT00000027692, ENSSSCT00000019459	1419	11	11368	4.36979	1	0.455052	12.1858
GOTERM_BP_DIRECT	GO:0010501~RNA secondary structure unwinding	11	0.558659	0.00855691	ENSSSCT00000006300, ENSSSCT00000019541, ENSSSCT00000018227, ENSSSCT00000027762, ENSSSCT00000010825, ENSSSCT00000018679, ENSSSCT00000025399, ENSSSCT00000015052, ENSSSCT00000025125, ENSSSCT00000004740, ENSSSCT00000011217	1419	35	11368	2.51783	1	0.502449	14.2572
GOTERM_BP_DIRECT	GO:0000470~maturation of LSU-rRNA	7	0.35551	0.00982316	ENSSSCT00000000758, ENSSSCT00000015328, ENSSSCT00000017547, ENSSSCT00000009847, ENSSSCT00000000064, ENSSSCT00000023591, ENSSSCT00000017240	1419	16	11368	3.50493	1	0.541407	16.1963
GOTERM_BP_DIRECT	GO:0001522~pseudouridine synthesis	5	0.253936	0.0111336	ENSSSCT00000012144, ENSSSCT00000033158, ENSSSCT00000010680, ENSSSCT00000022770, ENSSSCT00000000867, ENSSSCT00000014017	1419	8	11368	5.00705	1	0.576956	18.1594
GOTERM_BP_DIRECT	GO:0030488~tRNA methylation	5	0.253936	0.0111336	ENSSSCT00000004958, ENSSSCT00000018622, ENSSSCT00000014242, ENSSSCT00000007715, ENSSSCT00000012632	1419	8	11368	5.00705	1	0.576956	18.1594
GOTERM_BP_DIRECT	GO:0006390~transcription from mitochondrial promoter	5	0.253936	0.0111336	ENSSSCT00000015782, ENSSSCT00000029390, ENSSSCT00000026177, ENSSSCT00000032587, ENSSSCT00000003763	1419	8	11368	5.00705	1	0.576956	18.1594
GOTERM_BP_DIRECT	GO:0000027~ribosomal large subunit assembly	7	0.35551	0.0136073	ENSSSCT00000023017, ENSSSCT00000003716, ENSSSCT00000004857, ENSSSCT00000014148, ENSSSCT00000003877, ENSSSCT00000014926, ENSSSCT00000026411	1419	17	11368	3.29876	1	0.641213	21.7474
GOTERM_BP_DIRECT	GO:0086073~bundle of His cell-Purkinje myocyte adhesion involved in cell communication	4	0.203149	0.0159341	ENSSSCT00000025628, ENSSSCT00000001118, ENSSSCT00000029235, ENSSSCT00000022913, ENSSSCT00000018974	1419	5	11368	6.40902	1	0.689915	24.9863
GOTERM_BP_DIRECT	GO:0045653~negative regulation of megakaryocyte differentiation	4	0.203149	0.0159341	ENSSSCT00000031617, ENSSSCT00000026997, ENSSSCT00000023667, ENSSSCT00000029000	1419	5	11368	6.40902	1	0.689915	24.9863
GOTERM_BP_DIRECT	GO:0009303~rRNA transcription	4	0.203149	0.0159341	ENSSSCT00000024544, ENSSSCT00000019512, ENSSSCT00000008871, ENSSSCT00000011560	1419	5	11368	6.40902	1	0.689915	24.9863
GOTERM_BP_DIRECT	GO:0070475~rRNA base methylation	4	0.203149	0.0159341	ENSSSCT00000025035, ENSSSCT00000000758, ENSSSCT00000027060, ENSSSCT00000008447	1419	5	11368	6.40902	1	0.689915	24.9863
GOTERM_BP_DIRECT	GO:0006189~'de novo' IMP biosynthetic process	4	0.203149	0.0159341	ENSSSCT00000024827, ENSSSCT00000009749, ENSSSCT00000009745, ENSSSCT00000009746, ENSSSCT00000023147	1419	5	11368	6.40902	1	0.689915	24.9863
GOTERM_BP_DIRECT	GO:0000467~exonucleolytic trimming to generate mature 3'-end of 5.8S rRNA from tricistronic rRNA transcript (SSU-rRNA, 5.8S rRNA, LSU-rRNA)	4	0.203149	0.0159341	ENSSSCT00000006273, ENSSSCT00000005895, ENSSSCT00000009962, ENSSSCT00000035976	1419	5	11368	6.40902	1	0.689915	24.9863
GOTERM_BP_DIRECT	GO:0008654~phospholipid biosynthetic process	6	0.304723	0.016275	ENSSSCT00000023214, ENSSSCT00000008069, ENSSSCT00000031257, ENSSSCT00000006407, ENSSSCT00000018634, ENSSSCT00000029641, ENSSSCT00000035582	1419	13	11368	3.69751	1	0.688471	25.4501
GOTERM_BP_DIRECT	GO:0008033~tRNA processing	7	0.35551	0.0183012	ENSSSCT00000012144, ENSSSCT00000010680, ENSSSCT00000003155, ENSSSCT00000018562, ENSSSCT00000022996, ENSSSCT00000024537, ENSSSCT00000023201, ENSSSCT00000033142	1419	18	11368	3.1155	1	0.722182	28.1512
GOTERM_BP_DIRECT	GO:0006352~DNA-templated transcription, initiation	6	0.304723	0.0227667	ENSSSCT00000007587, ENSSSCT00000031617, ENSSSCT00000026997, ENSSSCT00000023667, ENSSSCT00000029000, ENSSSCT00000022269	1419	14	11368	3.4334	1	0.789633	33.7815
GOTERM_BP_DIRECT	GO:0000028~ribosomal small subunit assembly	6	0.304723	0.0227667	ENSSSCT00000019348, ENSSSCT00000004425, ENSSSCT00000005626, ENSSSCT00000028839, ENSSSCT00000018735, ENSSSCT00000023504	1419	14	11368	3.4334	1	0.789633	33.7815
GOTERM_BP_DIRECT	GO:0055085~transmembrane transport	18	0.91417	0.0230246	ENSSSCT00000017651, ENSSSCT00000016471, ENSSSCT00000013585, ENSSSCT00000008557, ENSSSCT00000011297, ENSSSCT00000010726, ENSSSCT00000026976, ENSSSCT00000018791, ENSSSCT00000013802, ENSSSCT00000003427, ENSSSCT00000026244, ENSSSCT00000016765, ENSSSCT00000032644, ENSSSCT00000009941, ENSSSCT00000010214, ENSSSCT00000015619, ENSSSCT00000035723, ENSSSCT00000018733	1419	82	11368	1.75857	1	0.785641	34.0936
GOTERM_BP_DIRECT	GO:1901998~toxin transport	8	0.406298	0.0235003	ENSSSCT00000009094, ENSSSCT00000000535, ENSSSCT00000007106, ENSSSCT00000023076, ENSSSCT00000016473, ENSSSCT00000009172, ENSSSCT00000022242, ENSSSCT00000004476	1419	24	11368	2.67043	1	0.784882	34.6656
GOTERM_BP_DIRECT	GO:0007080~mitotic metaphase plate congression	7	0.35551	0.023992	ENSSSCT00000018659, ENSSSCT00000014219, ENSSSCT00000024108, ENSSSCT00000004347, ENSSSCT00000006810, ENSSSCT00000019068, ENSSSCT00000029036	1419	19	11368	2.95152	1	0.78438	35.2519
GOTERM_BP_DIRECT	GO:0006122~mitochondrial electron transport, ubiquinol to cytochrome c	5	0.253936	0.0272096	ENSSSCT00000018195, ENSSSCT00000004318, ENSSSCT00000008595, ENSSSCT00000031506, ENSSSCT00000012433	1419	10	11368	4.00564	1	0.818223	38.968
GOTERM_BP_DIRECT	GO:0006744~ubiquinone biosynthetic process	5	0.253936	0.0272096	ENSSSCT00000024393, ENSSSCT00000004806, ENSSSCT00000006208, ENSSSCT00000029758, ENSSSCT00000010853	1419	10	11368	4.00564	1	0.818223	38.968
GOTERM_BP_DIRECT	GO:0006164~purine nucleotide biosynthetic process	4	0.203149	0.0289333	ENSSSCT00000024827, ENSSSCT00000017609, ENSSSCT00000002527, ENSSSCT00000013733	1419	6	11368	5.34085	1	0.830682	40.8749
GOTERM_BP_DIRECT	GO:0006820~anion transport	4	0.203149	0.0289333	ENSSSCT00000016471, ENSSSCT00000011297, ENSSSCT00000026244, ENSSSCT00000015619	1419	6	11368	5.34085	1	0.830682	40.8749
GOTERM_BP_DIRECT	GO:0000059~protein import into nucleus, docking	4	0.203149	0.0289333	ENSSSCT00000002238, ENSSSCT00000010426, ENSSSCT00000015000, ENSSSCT00000019068	1419	6	11368	5.34085	1	0.830682	40.8749
GOTERM_BP_DIRECT	GO:0006610~ribosomal protein import into nucleus	4	0.203149	0.0289333	ENSSSCT00000002238, ENSSSCT00000010426, ENSSSCT00000015000, ENSSSCT00000019068	1419	6	11368	5.34085	1	0.830682	40.8749
GOTERM_BP_DIRECT	GO:0030517~negative regulation of axon extension	4	0.203149	0.0289333	ENSSSCT00000018124, ENSSSCT00000011101, ENSSSCT00000019297, ENSSSCT00000026829	1419	6	11368	5.34085	1	0.830682	40.8749
GOTERM_BP_DIRECT	GO:0009396~folic acid-containing compound biosynthetic process	4	0.203149	0.0289333	ENSSSCT00000029465, ENSSSCT00000009078, ENSSSCT00000030694, ENSSSCT00000002527	1419	6	11368	5.34085	1	0.830682	40.8749
GOTERM_BP_DIRECT	GO:0006099~tricarboxylic acid cycle	8	0.406298	0.029226	ENSSSCT00000013975, ENSSSCT00000001968, ENSSSCT00000029845, ENSSSCT00000023472, ENSSSCT00000002639, ENSSSCT00000007846, ENSSSCT00000027692, ENSSSCT00000010304	1419	25	11368	2.56361	1	0.827409	41.1931
GOTERM_BP_DIRECT	GO:0016573~histone acetylation	6	0.304723	0.030724	ENSSSCT00000026250, ENSSSCT00000012717, ENSSSCT00000014679, ENSSSCT00000003499, ENSSSCT00000030643, ENSSSCT00000017461	1419	15	11368	3.20451	1	0.836441	42.7964
GOTERM_BP_DIRECT	GO:0007339~binding of sperm to zona pellucida	7	0.35551	0.0307542	ENSSSCT00000009094, ENSSSCT00000000535, ENSSSCT00000007106, ENSSSCT00000023076, ENSSSCT00000009172, ENSSSCT00000022242, ENSSSCT00000004476	1419	20	11368	2.80395	1	0.83071	42.8282
GOTERM_BP_DIRECT	GO:0000082~G1/S transition of mitotic cell cycle	9	0.457085	0.032582	ENSSSCT00000011098, ENSSSCT00000024309, ENSSSCT00000009990, ENSSSCT00000003156, ENSSSCT00000007092, ENSSSCT00000014219, ENSSSCT00000006686, ENSSSCT00000032198, ENSSSCT00000028011	1419	31	11368	2.32585	1	0.842217	44.7275
GOTERM_BP_DIRECT	GO:0070584~mitochondrion morphogenesis	5	0.253936	0.0386245	ENSSSCT00000011221, ENSSSCT00000007909, ENSSSCT00000017952, ENSSSCT00000013931, ENSSSCT00000018632	1419	11	11368	3.64149	1	0.883932	50.5912
GOTERM_BP_DIRECT	GO:0001836~release of cytochrome c from mitochondria	5	0.253936	0.0386245	ENSSSCT00000031745, ENSSSCT00000007909, ENSSSCT00000028028, ENSSSCT00000034561, ENSSSCT00000003956, ENSSSCT00000001689	1419	11	11368	3.64149	1	0.883932	50.5912
GOTERM_BP_DIRECT	GO:0016226~iron-sulfur cluster assembly	5	0.253936	0.0386245	ENSSSCT00000028362, ENSSSCT00000008770, ENSSSCT00000006438, ENSSSCT00000008907, ENSSSCT00000002631	1419	11	11368	3.64149	1	0.883932	50.5912
GOTERM_BP_DIRECT	GO:0006541~glutamine metabolic process	5	0.253936	0.0386245	ENSSSCT00000024827, ENSSSCT00000017466, ENSSSCT00000004395, ENSSSCT00000010851, ENSSSCT00000011350	1419	11	11368	3.64149	1	0.883932	50.5912
GOTERM_BP_DIRECT	GO:0001731~formation of translation preinitiation complex	6	0.304723	0.0402244	ENSSSCT00000004007, ENSSSCT00000000147, ENSSSCT00000010730, ENSSSCT00000017045, ENSSSCT00000029656, ENSSSCT00000023188	1419	16	11368	3.00423	1	0.889451	52.0425
GOTERM_BP_DIRECT	GO:0000466~maturation of 5.8S rRNA from tricistronic rRNA transcript (SSU-rRNA, 5.8S rRNA, LSU-rRNA)	3	0.152362	0.0427741	ENSSSCT00000017547, ENSSSCT00000010967, ENSSSCT00000018820	1419	3	11368	8.01128	1	0.899897	54.2724
GOTERM_BP_DIRECT	GO:0010917~negative regulation of mitochondrial membrane potential	3	0.152362	0.0427741	ENSSSCT00000012593, ENSSSCT00000015339, ENSSSCT00000004587	1419	3	11368	8.01128	1	0.899897	54.2724
GOTERM_BP_DIRECT	GO:0051716~cellular response to stimulus	3	0.152362	0.0427741	ENSSSCT00000022870, ENSSSCT00000002643, ENSSSCT00000010712	1419	3	11368	8.01128	1	0.899897	54.2724
GOTERM_BP_DIRECT	GO:0002934~desmosome organization	3	0.152362	0.0427741	ENSSSCT00000025628, ENSSSCT00000001118, ENSSSCT00000029235, ENSSSCT00000004591	1419	3	11368	8.01128	1	0.899897	54.2724
GOTERM_BP_DIRECT	GO:1903071~positive regulation of ER-associated ubiquitin-dependent protein catabolic process	3	0.152362	0.0427741	ENSSSCT00000013964, ENSSSCT00000034216, ENSSSCT00000034466, ENSSSCT00000033819, ENSSSCT00000027988, ENSSSCT00000014712	1419	3	11368	8.01128	1	0.899897	54.2724
GOTERM_BP_DIRECT	GO:0098911~regulation of ventricular cardiac muscle cell action potential	4	0.203149	0.0460037	ENSSSCT00000025628, ENSSSCT00000001118, ENSSSCT00000029235, ENSSSCT00000022913, ENSSSCT00000018974	1419	7	11368	4.57787	1	0.912351	56.9565
GOTERM_BP_DIRECT	GO:0043928~exonucleolytic nuclear-transcribed mRNA catabolic process involved in deadenylation-dependent decay	4	0.203149	0.0460037	ENSSSCT00000006273, ENSSSCT00000005895, ENSSSCT00000009962, ENSSSCT00000035976	1419	7	11368	4.57787	1	0.912351	56.9565
GOTERM_BP_DIRECT	GO:0046597~negative regulation of viral entry into host cell	4	0.203149	0.0460037	ENSSSCT00000013739, ENSSSCT00000004847, ENSSSCT00000001341, ENSSSCT00000001343	1419	7	11368	4.57787	1	0.912351	56.9565
GOTERM_BP_DIRECT	GO:0034644~cellular response to UV	7	0.35551	0.0477209	ENSSSCT00000032581, ENSSSCT00000003572, ENSSSCT00000010604, ENSSSCT00000003499, ENSSSCT00000030998, ENSSSCT00000000802, ENSSSCT00000001689	1419	22	11368	2.54904	1	0.916458	58.3224
GOTERM_BP_DIRECT	GO:0006270~DNA replication initiation	6	0.304723	0.0513149	ENSSSCT00000031013, ENSSSCT00000003156, ENSSSCT00000013328, ENSSSCT00000033790, ENSSSCT00000006686, ENSSSCT00000012721, ENSSSCT00000019020	1419	17	11368	2.82751	1	0.927737	61.0498
GOTERM_BP_DIRECT	GO:0097352~autophagosome maturation	5	0.253936	0.0523657	ENSSSCT00000029311, ENSSSCT00000005928, ENSSSCT00000014822, ENSSSCT00000027988, ENSSSCT00000035560	1419	12	11368	3.33803	1	0.928386	61.8148
GOTERM_BP_DIRECT	GO:0000079~regulation of cyclin-dependent protein serine/threonine kinase activity	5	0.253936	0.0523657	ENSSSCT00000015451, ENSSSCT00000009960, ENSSSCT00000013457, ENSSSCT00000017647, ENSSSCT00000003956	1419	12	11368	3.33803	1	0.928386	61.8148
GOTERM_BP_DIRECT	GO:0051301~cell division	11	0.558659	0.0611208	ENSSSCT00000025596, ENSSSCT00000036639, ENSSSCT00000018544, ENSSSCT00000027418, ENSSSCT00000019329, ENSSSCT00000004368, ENSSSCT00000023105, ENSSSCT00000004990, ENSSSCT00000015655, ENSSSCT00000028931, ENSSSCT00000019020	1419	47	11368	1.87498	1	0.952119	67.6598
GOTERM_BP_DIRECT	GO:0010332~response to gamma radiation	6	0.304723	0.0640125	ENSSSCT00000031745, ENSSSCT00000034561, ENSSSCT00000006548, ENSSSCT00000028356, ENSSSCT00000026354, ENSSSCT00000001689, ENSSSCT00000008604	1419	18	11368	2.67043	1	0.956481	69.397
GOTERM_BP_DIRECT	GO:0070534~protein K63-linked ubiquitination	6	0.304723	0.0640125	ENSSSCT00000006417, ENSSSCT00000011955, ENSSSCT00000033074, ENSSSCT00000000992, ENSSSCT00000001585, ENSSSCT00000014327	1419	18	11368	2.67043	1	0.956481	69.397
GOTERM_BP_DIRECT	GO:0000492~box C/D snoRNP assembly	4	0.203149	0.0669258	ENSSSCT00000026250, ENSSSCT00000012717, ENSSSCT00000003499, ENSSSCT00000010322	1419	8	11368	4.00564	1	0.960382	71.0578
GOTERM_BP_DIRECT	GO:0009116~nucleoside metabolic process	4	0.203149	0.0669258	ENSSSCT00000022447, ENSSSCT00000009749, ENSSSCT00000002941, ENSSSCT00000009746, ENSSSCT00000013733	1419	8	11368	4.00564	1	0.960382	71.0578
GOTERM_BP_DIRECT	GO:0033617~mitochondrial respiratory chain complex IV assembly	4	0.203149	0.0669258	ENSSSCT00000018928, ENSSSCT00000005378, ENSSSCT00000016182, ENSSSCT00000027544	1419	8	11368	4.00564	1	0.960382	71.0578
GOTERM_BP_DIRECT	GO:0006886~intracellular protein transport	26	1.32047	0.0694836	ENSSSCT00000025216, ENSSSCT00000008946, ENSSSCT00000026829, ENSSSCT00000019068, ENSSSCT00000010934, ENSSSCT00000003461, ENSSSCT00000030395, ENSSSCT00000034466, ENSSSCT00000007760, ENSSSCT00000004948, ENSSSCT00000013281, ENSSSCT00000003445, ENSSSCT00000005033, ENSSSCT00000034216, ENSSSCT00000033819, ENSSSCT00000023228, ENSSSCT00000035560, ENSSSCT00000024360, ENSSSCT00000004629, ENSSSCT00000013964,…	1419	148	11368	1.40739	1	0.9632	72.4454
GOTERM_BP_DIRECT	GO:0006446~regulation of translational initiation	6	0.304723	0.0783056	ENSSSCT00000004007, ENSSSCT00000000147, ENSSSCT00000002643, ENSSSCT00000019541, ENSSSCT00000010712, ENSSSCT00000006215	1419	19	11368	2.52988	1	0.97477	76.7649
GOTERM_BP_DIRECT	GO:0009620~response to fungus	3	0.152362	0.078523	ENSSSCT00000005425, ENSSSCT00000025776, ENSSSCT00000001689	1419	4	11368	6.00846	1	0.973556	76.8628
GOTERM_BP_DIRECT	GO:0035020~regulation of Rac protein signal transduction	3	0.152362	0.078523	ENSSSCT00000005528, ENSSSCT00000001986, ENSSSCT00000035659	1419	4	11368	6.00846	1	0.973556	76.8628
GOTERM_BP_DIRECT	GO:0000154~rRNA modification	3	0.152362	0.078523	ENSSSCT00000029302, ENSSSCT00000007848, ENSSSCT00000014530	1419	4	11368	6.00846	1	0.973556	76.8628
GOTERM_BP_DIRECT	GO:0070125~mitochondrial translational elongation	3	0.152362	0.078523	ENSSSCT00000017674, ENSSSCT00000024924, ENSSSCT00000008551	1419	4	11368	6.00846	1	0.973556	76.8628
GOTERM_BP_DIRECT	GO:2000643~positive regulation of early endosome to late endosome transport	3	0.152362	0.078523	ENSSSCT00000018358, ENSSSCT00000013522, ENSSSCT00000016377	1419	4	11368	6.00846	1	0.973556	76.8628
GOTERM_BP_DIRECT	GO:1903959~regulation of anion transmembrane transport	3	0.152362	0.078523	ENSSSCT00000026087, ENSSSCT00000011297, ENSSSCT00000015619	1419	4	11368	6.00846	1	0.973556	76.8628
GOTERM_BP_DIRECT	GO:0071051~polyadenylation-dependent snoRNA 3'-end processing	3	0.152362	0.078523	ENSSSCT00000006273, ENSSSCT00000005895, ENSSSCT00000006505	1419	4	11368	6.00846	1	0.973556	76.8628
GOTERM_BP_DIRECT	GO:0090666~scaRNA localization to Cajal body	3	0.152362	0.078523	ENSSSCT00000000535, ENSSSCT00000009172, ENSSSCT00000004476	1419	4	11368	6.00846	1	0.973556	76.8628
GOTERM_BP_DIRECT	GO:0019262~N-acetylneuraminate catabolic process	3	0.152362	0.078523	ENSSSCT00000013984, ENSSSCT00000035843, ENSSSCT00000034326, ENSSSCT00000015731, ENSSSCT00000028771	1419	4	11368	6.00846	1	0.973556	76.8628
GOTERM_BP_DIRECT	GO:0030718~germ-line stem cell population maintenance	3	0.152362	0.078523	ENSSSCT00000001516, ENSSSCT00000027223, ENSSSCT00000006790	1419	4	11368	6.00846	1	0.973556	76.8628
GOTERM_BP_DIRECT	GO:0007042~lysosomal lumen acidification	3	0.152362	0.078523	ENSSSCT00000008828, ENSSSCT00000035560, ENSSSCT00000005469	1419	4	11368	6.00846	1	0.973556	76.8628
GOTERM_BP_DIRECT	GO:0031536~positive regulation of exit from mitosis	3	0.152362	0.078523	ENSSSCT00000031403, ENSSSCT00000014219, ENSSSCT00000008126	1419	4	11368	6.00846	1	0.973556	76.8628
GOTERM_BP_DIRECT	GO:0045040~protein import into mitochondrial outer membrane	3	0.152362	0.078523	ENSSSCT00000016759, ENSSSCT00000000103, ENSSSCT00000015615	1419	4	11368	6.00846	1	0.973556	76.8628
GOTERM_BP_DIRECT	GO:0051259~protein oligomerization	7	0.35551	0.0822184	ENSSSCT00000025485, ENSSSCT00000005425, ENSSSCT00000009990, ENSSSCT00000018510, ENSSSCT00000010322, ENSSSCT00000028813, ENSSSCT00000005840, ENSSSCT00000036679, ENSSSCT00000030585	1419	25	11368	2.24316	1	0.976543	78.4685
GOTERM_BP_DIRECT	GO:0006611~protein export from nucleus	5	0.253936	0.0866617	ENSSSCT00000007791, ENSSSCT00000010159, ENSSSCT00000015665, ENSSSCT00000025703, ENSSSCT00000010685	1419	14	11368	2.86117	1	0.979854	80.2599
GOTERM_BP_DIRECT	GO:0000070~mitotic sister chromatid segregation	5	0.253936	0.0866617	ENSSSCT00000009366, ENSSSCT00000011737, ENSSSCT00000019329, ENSSSCT00000016997, ENSSSCT00000018878	1419	14	11368	2.86117	1	0.979854	80.2599
GOTERM_BP_DIRECT	GO:0051131~chaperone-mediated protein complex assembly	4	0.203149	0.0913472	ENSSSCT00000000535, ENSSSCT00000014773, ENSSSCT00000007735, ENSSSCT00000015615	1419	9	11368	3.56057	1	0.982832	81.996
GOTERM_BP_DIRECT	GO:0046328~regulation of JNK cascade	4	0.203149	0.0913472	ENSSSCT00000010423, ENSSSCT00000014493, ENSSSCT00000006417, ENSSSCT00000007413	1419	9	11368	3.56057	1	0.982832	81.996
GOTERM_BP_DIRECT	GO:0030490~maturation of SSU-rRNA	4	0.203149	0.0913472	ENSSSCT00000003050, ENSSSCT00000008799, ENSSSCT00000000064, ENSSSCT00000013835	1419	9	11368	3.56057	1	0.982832	81.996
GOTERM_BP_DIRECT	GO:0034587~piRNA metabolic process	4	0.203149	0.0913472	ENSSSCT00000032144, ENSSSCT00000027996, ENSSSCT00000008445, ENSSSCT00000023111, ENSSSCT00000027223	1419	9	11368	3.56057	1	0.982832	81.996
GOTERM_BP_DIRECT	GO:0007250~activation of NF-kappaB-inducing kinase activity	4	0.203149	0.0913472	ENSSSCT00000005425, ENSSSCT00000006417, ENSSSCT00000033074, ENSSSCT00000036679	1419	9	11368	3.56057	1	0.982832	81.996
GOTERM_BP_DIRECT	GO:0010839~negative regulation of keratinocyte proliferation	4	0.203149	0.0913472	ENSSSCT00000003961, ENSSSCT00000032274, ENSSSCT00000003956, ENSSSCT00000029337	1419	9	11368	3.56057	1	0.982832	81.996
GOTERM_BP_DIRECT	GO:0097284~hepatocyte apoptotic process	4	0.203149	0.0913472	ENSSSCT00000007909, ENSSSCT00000005528, ENSSSCT00000000271, ENSSSCT00000000272	1419	9	11368	3.56057	1	0.982832	81.996
GOTERM_BP_DIRECT	GO:0007059~chromosome segregation	9	0.457085	0.0930603	ENSSSCT00000005249, ENSSSCT00000014282, ENSSSCT00000006243, ENSSSCT00000016997, ENSSSCT00000017340, ENSSSCT00000004990, ENSSSCT00000028011, ENSSSCT00000017766, ENSSSCT00000008907	1419	38	11368	1.89741	1	0.983158	82.594
GOTERM_BP_DIRECT	GO:0006281~DNA repair	16	0.812595	0.0953086	ENSSSCT00000032554, ENSSSCT00000023550, ENSSSCT00000014117, ENSSSCT00000002390, ENSSSCT00000011955, ENSSSCT00000026546, ENSSSCT00000032250, ENSSSCT00000016581, ENSSSCT00000025485, ENSSSCT00000026250, ENSSSCT00000018544, ENSSSCT00000033717, ENSSSCT00000012717, ENSSSCT00000018510, ENSSSCT00000003499, ENSSSCT00000016478, ENSSSCT00000028813, ENSSSCT00000029036	1419	84	11368	1.52596	1	0.983868	83.3504
GOTERM_BP_DIRECT	GO:0030097~hemopoiesis	7	0.35551	0.0961371	ENSSSCT00000031745, ENSSSCT00000028362, ENSSSCT00000009235, ENSSSCT00000034561, ENSSSCT00000014692, ENSSSCT00000015665, ENSSSCT00000012715, ENSSSCT00000013183	1419	26	11368	2.15688	1	0.983513	83.6212

## Sheet: Cluster2
Supplemental Table S6 GO Biological Process enrichment analysis (Cluster2)
Category	Term	Count	%	PValue	Genes	List Total	Pop Hits	Pop Total	Fold Enrichment	Bonferroni	Benjamini	FDR
GOTERM_BP_DIRECT	GO:0007155~cell adhesion	25	3.04507	1.08e-08	ENSSSCT00000004108, ENSSSCT00000018922, ENSSSCT00000036240, ENSSSCT00000002139, ENSSSCT00000036617, ENSSSCT00000032746, ENSSSCT00000012040, ENSSSCT00000010091, ENSSSCT00000003429, ENSSSCT00000003428, ENSSSCT00000004631, ENSSSCT00000033971, ENSSSCT00000016488, ENSSSCT00000033397, ENSSSCT00000032601, ENSSSCT00000006888, ENSSSCT00000035666, ENSSSCT00000008382, ENSSSCT00000026743, ENSSSCT00000036466,…	566	126	11368	3.98508	2.13e-05	2.13e-05	1.85e-05
GOTERM_BP_DIRECT	GO:0010629~negative regulation of gene expression	15	1.82704	1.87e-06	ENSSSCT00000014604, ENSSSCT00000010889, ENSSSCT00000036617, ENSSSCT00000016339, ENSSSCT00000036277, ENSSSCT00000000519, ENSSSCT00000029401, ENSSSCT00000009458, ENSSSCT00000019325, ENSSSCT00000004688, ENSSSCT00000012672, ENSSSCT00000018493, ENSSSCT00000014068, ENSSSCT00000004631, ENSSSCT00000031350	566	63	11368	4.7821	0.0037011	0.00185226	0.00321309
GOTERM_BP_DIRECT	GO:0019882~antigen processing and presentation	10	1.21803	3.64e-06	ENSSSCT00000001612, ENSSSCT00000001329, ENSSSCT00000001634, ENSSSCT00000001334, ENSSSCT00000036412, ENSSSCT00000008382, ENSSSCT00000007284, ENSSSCT00000001330, ENSSSCT00000001609, ENSSSCT00000000519, ENSSSCT00000001617, ENSSSCT00000004552	566	27	11368	7.43882	0.00718302	0.0024001	0.00624673
GOTERM_BP_DIRECT	GO:0006955~immune response	26	3.16687	1.61e-05	ENSSSCT00000001612, ENSSSCT00000001329, ENSSSCT00000001616, ENSSSCT00000001634, ENSSSCT00000001633, ENSSSCT00000025711, ENSSSCT00000023437, ENSSSCT00000036412, ENSSSCT00000032717, ENSSSCT00000001609, ENSSSCT00000010514, ENSSSCT00000036052, ENSSSCT00000010953, ENSSSCT00000010872, ENSSSCT00000001334, ENSSSCT00000009833, ENSSSCT00000001330, ENSSSCT00000009832, ENSSSCT00000009813, ENSSSCT00000000518,…	566	198	11368	2.6374	0.0313915	0.00794198	0.0276346
GOTERM_BP_DIRECT	GO:0002504~antigen processing and presentation of peptide or polysaccharide antigen via MHC class II	6	0.730816	6.1e-05	ENSSSCT00000001612, ENSSSCT00000001634, ENSSSCT00000001616, ENSSSCT00000001633, ENSSSCT00000001609, ENSSSCT00000001617	566	10	11368	12.0509	0.113813	0.0238759	0.104649
GOTERM_BP_DIRECT	GO:0051017~actin filament bundle assembly	8	0.974421	0.000158	ENSSSCT00000014650, ENSSSCT00000033699, ENSSSCT00000015759, ENSSSCT00000034270, ENSSSCT00000034402, ENSSSCT00000010313, ENSSSCT00000001539, ENSSSCT00000014123, ENSSSCT00000033884, ENSSSCT00000018662, ENSSSCT00000011410	566	25	11368	6.42714	0.269392	0.0509682	0.271622
GOTERM_BP_DIRECT	GO:0015908~fatty acid transport	5	0.609013	0.00036	ENSSSCT00000000078, ENSSSCT00000016766, ENSSSCT00000015578, ENSSSCT00000010870, ENSSSCT00000005128	566	8	11368	12.553	0.510178	0.0969335	0.616561
GOTERM_BP_DIRECT	GO:0036120~cellular response to platelet-derived growth factor stimulus	5	0.609013	0.000623	ENSSSCT00000004688, ENSSSCT00000014123, ENSSSCT00000035640, ENSSSCT00000036277, ENSSSCT00000033397	566	9	11368	11.1582	0.709005	0.14299	1.06401
GOTERM_BP_DIRECT	GO:0007160~cell-matrix adhesion	9	1.09622	0.00173415	ENSSSCT00000036457, ENSSSCT00000017836, ENSSSCT00000036617, ENSSSCT00000032746, ENSSSCT00000004631, ENSSSCT00000012962, ENSSSCT00000033971, ENSSSCT00000035640, ENSSSCT00000014931, ENSSSCT00000032601	566	46	11368	3.92964	0.967937	0.317661	2.937
GOTERM_BP_DIRECT	GO:0043123~positive regulation of I-kappaB kinase/NF-kappaB signaling	13	1.58343	0.00193094	ENSSSCT00000036395, ENSSSCT00000018824, ENSSSCT00000025103, ENSSSCT00000025711, ENSSSCT00000036277, ENSSSCT00000024382, ENSSSCT00000004688, ENSSSCT00000034575, ENSSSCT00000007218, ENSSSCT00000008144, ENSSSCT00000014894, ENSSSCT00000031425, ENSSSCT00000032717, ENSSSCT00000036552, ENSSSCT00000036052, ENSSSCT00000001367	566	92	11368	2.83807	0.978308	0.318243	3.26511
GOTERM_BP_DIRECT	GO:0006954~inflammatory response	20	2.43605	0.00241152	ENSSSCT00000016859, ENSSSCT00000035182, ENSSSCT00000011953, ENSSSCT00000034270, ENSSSCT00000009833, ENSSSCT00000033884, ENSSSCT00000009832, ENSSSCT00000009813, ENSSSCT00000000518, ENSSSCT00000025684, ENSSSCT00000019014, ENSSSCT00000023437, ENSSSCT00000007218, ENSSSCT00000018466, ENSSSCT00000022767, ENSSSCT00000008144, ENSSSCT00000034402, ENSSSCT00000011649, ENSSSCT00000001539, ENSSSCT00000006051,…	566	187	11368	2.14811	0.991649	0.35276	4.06201
GOTERM_BP_DIRECT	GO:0032496~response to lipopolysaccharide	11	1.33983	0.00312725	ENSSSCT00000019014, ENSSSCT00000023437, ENSSSCT00000022767, ENSSSCT00000008144, ENSSSCT00000024303, ENSSSCT00000009833, ENSSSCT00000004166, ENSSSCT00000031350, ENSSSCT00000009832, ENSSSCT00000009813, ENSSSCT00000036052, ENSSSCT00000025684	566	73	11368	3.02648	0.997987	0.403888	5.23735
GOTERM_BP_DIRECT	GO:0048715~negative regulation of oligodendrocyte differentiation	4	0.487211	0.00367761	ENSSSCT00000009458, ENSSSCT00000017371, ENSSSCT00000017370, ENSSSCT00000026743	566	7	11368	11.477	0.999326	0.429777	6.1319
GOTERM_BP_DIRECT	GO:0048469~cell maturation	6	0.730816	0.00475422	ENSSSCT00000009458, ENSSSCT00000035182, ENSSSCT00000012672, ENSSSCT00000036664, ENSSSCT00000017573, ENSSSCT00000026743	566	23	11368	5.23951	0.999921	0.490674	7.85886
GOTERM_BP_DIRECT	GO:0042127~regulation of cell proliferation	14	1.70524	0.00611957	ENSSSCT00000019325, ENSSSCT00000008209, ENSSSCT00000023437, ENSSSCT00000008144, ENSSSCT00000022767, ENSSSCT00000000681, ENSSSCT00000031383, ENSSSCT00000033576, ENSSSCT00000009833, ENSSSCT00000036277, ENSSSCT00000009832, ENSSSCT00000033397, ENSSSCT00000009813, ENSSSCT00000036052, ENSSSCT00000025684	566	119	11368	2.36292	0.999995	0.555623	10.006
GOTERM_BP_DIRECT	GO:0009954~proximal/distal pattern formation	5	0.609013	0.00680984	ENSSSCT00000017371, ENSSSCT00000024788, ENSSSCT00000017370, ENSSSCT00000017402, ENSSSCT00000018179	566	16	11368	6.2765	0.999999	0.571067	11.0735
GOTERM_BP_DIRECT	GO:0008217~regulation of blood pressure	6	0.730816	0.00691639	ENSSSCT00000012672, ENSSSCT00000024788, ENSSSCT00000018199, ENSSSCT00000036617, ENSSSCT00000029514, ENSSSCT00000007004	566	25	11368	4.82035	0.999999	0.554773	11.2372
GOTERM_BP_DIRECT	GO:0033157~regulation of intracellular protein transport	3	0.365408	0.00715378	ENSSSCT00000029892, ENSSSCT00000008173, ENSSSCT00000010313	566	3	11368	20.0848	0.999999	0.546401	11.6009
GOTERM_BP_DIRECT	GO:0048729~tissue morphogenesis	3	0.365408	0.00715378	ENSSSCT00000005063, ENSSSCT00000028723, ENSSSCT00000005812	566	3	11368	20.0848	0.999999	0.546401	11.6009
GOTERM_BP_DIRECT	GO:0008283~cell proliferation	12	1.46163	0.00792789	ENSSSCT00000032039, ENSSSCT00000016935, ENSSSCT00000013274, ENSSSCT00000035483, ENSSSCT00000015382, ENSSSCT00000004323, ENSSSCT00000022576, ENSSSCT00000029322, ENSSSCT00000025512, ENSSSCT00000029401, ENSSSCT00000006649, ENSSSCT00000033337	566	96	11368	2.5106	1	0.564081	12.7772
GOTERM_BP_DIRECT	GO:0052696~flavonoid glucuronidation	4	0.487211	0.00819092	ENSSSCT00000026797, ENSSSCT00000026903, ENSSSCT00000017761, ENSSSCT00000017765	566	9	11368	8.92658	1	0.557388	13.1735
GOTERM_BP_DIRECT	GO:0009813~flavonoid biosynthetic process	4	0.487211	0.00819092	ENSSSCT00000026797, ENSSSCT00000026903, ENSSSCT00000017761, ENSSSCT00000017765	566	9	11368	8.92658	1	0.557388	13.1735
GOTERM_BP_DIRECT	GO:0006006~glucose metabolic process	6	0.730816	0.00822031	ENSSSCT00000000756, ENSSSCT00000006747, ENSSSCT00000010832, ENSSSCT00000001186, ENSSSCT00000012943, ENSSSCT00000018060, ENSSSCT00000036048	566	26	11368	4.63496	1	0.541157	13.2177
GOTERM_BP_DIRECT	GO:0042102~positive regulation of T cell proliferation	7	0.852619	0.00915558	ENSSSCT00000034116, ENSSSCT00000034270, ENSSSCT00000034402, ENSSSCT00000034535, ENSSSCT00000001539, ENSSSCT00000007374, ENSSSCT00000018060, ENSSSCT00000033884, ENSSSCT00000026743, ENSSSCT00000000519, ENSSSCT00000012992	566	37	11368	3.79983	1	0.563354	14.6126
GOTERM_BP_DIRECT	GO:0007605~sensory perception of sound	9	1.09622	0.0112363	ENSSSCT00000036664, ENSSSCT00000001180, ENSSSCT00000005431, ENSSSCT00000001193, ENSSSCT00000006203, ENSSSCT00000029514, ENSSSCT00000011250, ENSSSCT00000007878, ENSSSCT00000009105	566	62	11368	2.91554	1	0.622339	17.6405
GOTERM_BP_DIRECT	GO:0060463~lung lobe morphogenesis	3	0.365408	0.0138371	ENSSSCT00000010953, ENSSSCT00000033576, ENSSSCT00000006649	566	4	11368	15.0636	1	0.683582	21.2831
GOTERM_BP_DIRECT	GO:0010818~T cell chemotaxis	3	0.365408	0.0138371	ENSSSCT00000019503, ENSSSCT00000009833, ENSSSCT00000009832, ENSSSCT00000032974	566	4	11368	15.0636	1	0.683582	21.2831
GOTERM_BP_DIRECT	GO:0030816~positive regulation of cAMP metabolic process	3	0.365408	0.0138371	ENSSSCT00000023437, ENSSSCT00000009833, ENSSSCT00000009832	566	4	11368	15.0636	1	0.683582	21.2831
GOTERM_BP_DIRECT	GO:0006536~glutamate metabolic process	4	0.487211	0.0149371	ENSSSCT00000011527, ENSSSCT00000003097, ENSSSCT00000003032, ENSSSCT00000001186	566	11	11368	7.30357	1	0.696736	22.7777
GOTERM_BP_DIRECT	GO:0001525~angiogenesis	11	1.33983	0.0180622	ENSSSCT00000010161, ENSSSCT00000036664, ENSSSCT00000033922, ENSSSCT00000013274, ENSSSCT00000017573, ENSSSCT00000018586, ENSSSCT00000004631, ENSSSCT00000033576, ENSSSCT00000006753, ENSSSCT00000016488, ENSSSCT00000018060	566	94	11368	2.35035	1	0.750795	26.879
GOTERM_BP_DIRECT	GO:0030890~positive regulation of B cell proliferation	5	0.609013	0.0216271	ENSSSCT00000034762, ENSSSCT00000034116, ENSSSCT00000008144, ENSSSCT00000010435, ENSSSCT00000034535, ENSSSCT00000036052, ENSSSCT00000015601	566	22	11368	4.56473	1	0.799112	31.307
GOTERM_BP_DIRECT	GO:0060445~branching involved in salivary gland morphogenesis	3	0.365408	0.0223066	ENSSSCT00000034572, ENSSSCT00000036664, ENSSSCT00000033576	566	5	11368	12.0509	1	0.79747	32.1218
GOTERM_BP_DIRECT	GO:0072606~interleukin-8 secretion	3	0.365408	0.0223066	ENSSSCT00000016859, ENSSSCT00000019325, ENSSSCT00000018060	566	5	11368	12.0509	1	0.79747	32.1218
GOTERM_BP_DIRECT	GO:0032287~peripheral nervous system myelin maintenance	3	0.365408	0.0223066	ENSSSCT00000029892, ENSSSCT00000006527, ENSSSCT00000029514	566	5	11368	12.0509	1	0.79747	32.1218
GOTERM_BP_DIRECT	GO:0051764~actin crosslink formation	3	0.365408	0.0223066	ENSSSCT00000033699, ENSSSCT00000010313, ENSSSCT00000018662	566	5	11368	12.0509	1	0.79747	32.1218
GOTERM_BP_DIRECT	GO:0090162~establishment of epithelial cell polarity	3	0.365408	0.0223066	ENSSSCT00000026743, ENSSSCT00000007723, ENSSSCT00000012598	566	5	11368	12.0509	1	0.79747	32.1218
GOTERM_BP_DIRECT	GO:0042472~inner ear morphogenesis	6	0.730816	0.0251314	ENSSSCT00000010161, ENSSSCT00000036664, ENSSSCT00000017772, ENSSSCT00000033576, ENSSSCT00000009105, ENSSSCT00000032423	566	34	11368	3.54438	1	0.824401	35.4125
GOTERM_BP_DIRECT	GO:0045071~negative regulation of viral genome replication	5	0.609013	0.0251793	ENSSSCT00000032850, ENSSSCT00000024303, ENSSSCT00000010872, ENSSSCT00000010832, ENSSSCT00000009461	566	23	11368	4.36626	1	0.814521	35.467
GOTERM_BP_DIRECT	GO:0007156~homophilic cell adhesion via plasma membrane adhesion molecules	9	1.09622	0.0259099	ENSSSCT00000003429, ENSSSCT00000003428, ENSSSCT00000010354, ENSSSCT00000005392, ENSSSCT00000002977, ENSSSCT00000033634, ENSSSCT00000011250, ENSSSCT00000010353, ENSSSCT00000023766, ENSSSCT00000011410, ENSSSCT00000005409	566	72	11368	2.5106	1	0.813328	36.2927
GOTERM_BP_DIRECT	GO:0071222~cellular response to lipopolysaccharide	7	0.852619	0.0279122	ENSSSCT00000019325, ENSSSCT00000025103, ENSSSCT00000018466, ENSSSCT00000022767, ENSSSCT00000036552, ENSSSCT00000009832, ENSSSCT00000000519, ENSSSCT00000012992	566	47	11368	2.99135	1	0.826815	38.5048
GOTERM_BP_DIRECT	GO:0030326~embryonic limb morphogenesis	5	0.609013	0.0290623	ENSSSCT00000034572, ENSSSCT00000010161, ENSSSCT00000036664, ENSSSCT00000017402, ENSSSCT00000010870	566	24	11368	4.18433	1	0.8299	39.7425
GOTERM_BP_DIRECT	GO:0051607~defense response to virus	12	1.46163	0.0292569	ENSSSCT00000005680, ENSSSCT00000005677, ENSSSCT00000010872, ENSSSCT00000036478, ENSSSCT00000009832, ENSSSCT00000000519, ENSSSCT00000009461, ENSSSCT00000023437, ENSSSCT00000008144, ENSSSCT00000000614, ENSSSCT00000010832, ENSSSCT00000036052, ENSSSCT00000012992	566	116	11368	2.07774	1	0.822884	39.9496
GOTERM_BP_DIRECT	GO:0060993~kidney morphogenesis	3	0.365408	0.0323691	ENSSSCT00000005063, ENSSSCT00000028723, ENSSSCT00000005812	566	6	11368	10.0424	1	0.844846	43.1718
GOTERM_BP_DIRECT	GO:0048678~response to axon injury	3	0.365408	0.0323691	ENSSSCT00000015759, ENSSSCT00000029514, ENSSSCT00000012943, ENSSSCT00000036048	566	6	11368	10.0424	1	0.844846	43.1718
GOTERM_BP_DIRECT	GO:0048662~negative regulation of smooth muscle cell proliferation	4	0.487211	0.035546	ENSSSCT00000012672, ENSSSCT00000034270, ENSSSCT00000034402, ENSSSCT00000001539, ENSSSCT00000012943, ENSSSCT00000033884, ENSSSCT00000036048, ENSSSCT00000000519	566	15	11368	5.35595	1	0.863664	46.2926
GOTERM_BP_DIRECT	GO:0090026~positive regulation of monocyte chemotaxis	4	0.487211	0.035546	ENSSSCT00000005857, ENSSSCT00000001927, ENSSSCT00000034270, ENSSSCT00000034402, ENSSSCT00000001539, ENSSSCT00000033884, ENSSSCT00000009832	566	15	11368	5.35595	1	0.863664	46.2926
GOTERM_BP_DIRECT	GO:0030282~bone mineralization	4	0.487211	0.0421774	ENSSSCT00000012370, ENSSSCT00000033576, ENSSSCT00000016351, ENSSSCT00000008845	566	16	11368	5.0212	1	0.900577	52.2943
GOTERM_BP_DIRECT	GO:0050796~regulation of insulin secretion	4	0.487211	0.0421774	ENSSSCT00000019325, ENSSSCT00000010870, ENSSSCT00000018060, ENSSSCT00000000519	566	16	11368	5.0212	1	0.900577	52.2943
GOTERM_BP_DIRECT	GO:0048661~positive regulation of smooth muscle cell proliferation	4	0.487211	0.0421774	ENSSSCT00000034991, ENSSSCT00000009458, ENSSSCT00000035532, ENSSSCT00000034270, ENSSSCT00000034402, ENSSSCT00000015692, ENSSSCT00000001539, ENSSSCT00000034323, ENSSSCT00000033884	566	16	11368	5.0212	1	0.900577	52.2943
GOTERM_BP_DIRECT	GO:0038083~peptidyl-tyrosine autophosphorylation	5	0.609013	0.042733	ENSSSCT00000035474, ENSSSCT00000000681, ENSSSCT00000036277, ENSSSCT00000033397, ENSSSCT00000029401	566	27	11368	3.71941	1	0.897499	52.7673
GOTERM_BP_DIRECT	GO:0043950~positive regulation of cAMP-mediated signaling	3	0.365408	0.0438456	ENSSSCT00000023437, ENSSSCT00000009833, ENSSSCT00000009832	566	7	11368	8.60777	1	0.897571	53.7015
GOTERM_BP_DIRECT	GO:0048762~mesenchymal cell differentiation	3	0.365408	0.0438456	ENSSSCT00000034572, ENSSSCT00000036664, ENSSSCT00000033576	566	7	11368	8.60777	1	0.897571	53.7015
GOTERM_BP_DIRECT	GO:0033627~cell adhesion mediated by integrin	3	0.365408	0.0438456	ENSSSCT00000033922, ENSSSCT00000032746, ENSSSCT00000032707	566	7	11368	8.60777	1	0.897571	53.7015
GOTERM_BP_DIRECT	GO:2000406~positive regulation of T cell migration	3	0.365408	0.0438456	ENSSSCT00000034270, ENSSSCT00000034402, ENSSSCT00000001539, ENSSSCT00000033884, ENSSSCT00000035640, ENSSSCT00000009832	566	7	11368	8.60777	1	0.897571	53.7015
GOTERM_BP_DIRECT	GO:0042989~sequestering of actin monomers	3	0.365408	0.0438456	ENSSSCT00000035781, ENSSSCT00000016727, ENSSSCT00000009030, ENSSSCT00000036667, ENSSSCT00000013257	566	7	11368	8.60777	1	0.897571	53.7015
GOTERM_BP_DIRECT	GO:0060326~cell chemotaxis	7	0.852619	0.0466284	ENSSSCT00000014604, ENSSSCT00000023621, ENSSSCT00000015692, ENSSSCT00000009833, ENSSSCT00000009832, ENSSSCT00000009813, ENSSSCT00000012803	566	53	11368	2.65271	1	0.906148	55.9621
GOTERM_BP_DIRECT	GO:0030036~actin cytoskeleton organization	8	0.974421	0.0478707	ENSSSCT00000030549, ENSSSCT00000035781, ENSSSCT00000009030, ENSSSCT00000005915, ENSSSCT00000014123, ENSSSCT00000036667, ENSSSCT00000019485, ENSSSCT00000026617, ENSSSCT00000013257, ENSSSCT00000017277	566	67	11368	2.39819	1	0.906647	56.9373
GOTERM_BP_DIRECT	GO:0071320~cellular response to cAMP	4	0.487211	0.049381	ENSSSCT00000018101, ENSSSCT00000015176, ENSSSCT00000022576, ENSSSCT00000029322	566	17	11368	4.72584	1	0.908353	58.0955
GOTERM_BP_DIRECT	GO:0045746~negative regulation of Notch signaling pathway	4	0.487211	0.049381	ENSSSCT00000034572, ENSSSCT00000017371, ENSSSCT00000017370, ENSSSCT00000006753	566	17	11368	4.72584	1	0.908353	58.0955
GOTERM_BP_DIRECT	GO:0051281~positive regulation of release of sequestered calcium ion into cytosol	4	0.487211	0.049381	ENSSSCT00000023437, ENSSSCT00000009833, ENSSSCT00000016488, ENSSSCT00000009832	566	17	11368	4.72584	1	0.908353	58.0955
GOTERM_BP_DIRECT	GO:0030324~lung development	6	0.730816	0.0511128	ENSSSCT00000016859, ENSSSCT00000013891, ENSSSCT00000004631, ENSSSCT00000033576, ENSSSCT00000033878, ENSSSCT00000026743	566	41	11368	2.93924	1	0.910926	59.3875
GOTERM_BP_DIRECT	GO:0010628~positive regulation of gene expression	11	1.33983	0.0543436	ENSSSCT00000009458, ENSSSCT00000035182, ENSSSCT00000004688, ENSSSCT00000010161, ENSSSCT00000036617, ENSSSCT00000010784, ENSSSCT00000026717, ENSSSCT00000010514, ENSSSCT00000004166, ENSSSCT00000035640, ENSSSCT00000007836	566	113	11368	1.95516	1	0.919295	61.6982
GOTERM_BP_DIRECT	GO:0001706~endoderm formation	3	0.365408	0.0565715	ENSSSCT00000035952, ENSSSCT00000033376, ENSSSCT00000011620, ENSSSCT00000017258	566	8	11368	7.5318	1	0.923074	63.2188
GOTERM_BP_DIRECT	GO:0060670~branching involved in labyrinthine layer morphogenesis	3	0.365408	0.0565715	ENSSSCT00000017573, ENSSSCT00000033576, ENSSSCT00000014648	566	8	11368	7.5318	1	0.923074	63.2188
GOTERM_BP_DIRECT	GO:0050892~intestinal absorption	3	0.365408	0.0565715	ENSSSCT00000005063, ENSSSCT00000033820, ENSSSCT00000018060	566	8	11368	7.5318	1	0.923074	63.2188
GOTERM_BP_DIRECT	GO:0071803~positive regulation of podosome assembly	3	0.365408	0.0565715	ENSSSCT00000010313, ENSSSCT00000033397, ENSSSCT00000015601	566	8	11368	7.5318	1	0.923074	63.2188
GOTERM_BP_DIRECT	GO:0034612~response to tumor necrosis factor	3	0.365408	0.0565715	ENSSSCT00000016859, ENSSSCT00000019503, ENSSSCT00000001367, ENSSSCT00000032974	566	8	11368	7.5318	1	0.923074	63.2188
GOTERM_BP_DIRECT	GO:0048711~positive regulation of astrocyte differentiation	3	0.365408	0.0565715	ENSSSCT00000009458, ENSSSCT00000010953, ENSSSCT00000026743	566	8	11368	7.5318	1	0.923074	63.2188
GOTERM_BP_DIRECT	GO:2000249~regulation of actin cytoskeleton reorganization	3	0.365408	0.0565715	ENSSSCT00000000649, ENSSSCT00000033820, ENSSSCT00000016774	566	8	11368	7.5318	1	0.923074	63.2188
GOTERM_BP_DIRECT	GO:0050900~leukocyte migration	4	0.487211	0.0571408	ENSSSCT00000036617, ENSSSCT00000032746, ENSSSCT00000012040, ENSSSCT00000032707	566	18	11368	4.46329	1	0.920751	63.5982
GOTERM_BP_DIRECT	GO:0007017~microtubule-based process	5	0.609013	0.0594514	ENSSSCT00000014004, ENSSSCT00000002929, ENSSSCT00000014793, ENSSSCT00000012196, ENSSSCT00000001098	566	30	11368	3.34747	1	0.924581	65.1003
GOTERM_BP_DIRECT	GO:0007417~central nervous system development	5	0.609013	0.0656923	ENSSSCT00000004620, ENSSSCT00000001186, ENSSSCT00000036277, ENSSSCT00000033397, ENSSSCT00000004618	566	31	11368	3.23948	1	0.939538	68.8712
GOTERM_BP_DIRECT	GO:0051044~positive regulation of membrane protein ectodomain proteolysis	3	0.365408	0.0703945	ENSSSCT00000022767, ENSSSCT00000011625, ENSSSCT00000000519	566	9	11368	6.69494	1	0.947795	71.4551
GOTERM_BP_DIRECT	GO:0060484~lung-associated mesenchyme development	3	0.365408	0.0703945	ENSSSCT00000010161, ENSSSCT00000036664, ENSSSCT00000033576	566	9	11368	6.69494	1	0.947795	71.4551
GOTERM_BP_DIRECT	GO:0006103~2-oxoglutarate metabolic process	3	0.365408	0.0703945	ENSSSCT00000011527, ENSSSCT00000003097, ENSSSCT00000003032	566	9	11368	6.69494	1	0.947795	71.4551
GOTERM_BP_DIRECT	GO:0007339~binding of sperm to zona pellucida	4	0.487211	0.0742529	ENSSSCT00000008414, ENSSSCT00000032249, ENSSSCT00000025519, ENSSSCT00000012040	566	20	11368	4.01696	1	0.953037	73.4231
GOTERM_BP_DIRECT	GO:0006096~glycolytic process	4	0.487211	0.0742529	ENSSSCT00000000756, ENSSSCT00000013604, ENSSSCT00000011223, ENSSSCT00000019484	566	20	11368	4.01696	1	0.953037	73.4231
GOTERM_BP_DIRECT	GO:0070374~positive regulation of ERK1 and ERK2 cascade	10	1.21803	0.0771192	ENSSSCT00000016859, ENSSSCT00000014604, ENSSSCT00000014068, ENSSSCT00000010435, ENSSSCT00000004631, ENSSSCT00000033576, ENSSSCT00000033397, ENSSSCT00000022576, ENSSSCT00000032707, ENSSSCT00000029322	566	105	11368	1.91284	1	0.955796	74.8016
GOTERM_BP_DIRECT	GO:0005975~carbohydrate metabolic process	10	1.21803	0.0807732	ENSSSCT00000016859, ENSSSCT00000006069, ENSSSCT00000003489, ENSSSCT00000011850, ENSSSCT00000030579, ENSSSCT00000007441, ENSSSCT00000014597, ENSSSCT00000036515, ENSSSCT00000009251, ENSSSCT00000034626	566	106	11368	1.89479	1	0.95965	76.4613
GOTERM_BP_DIRECT	GO:0042511~positive regulation of tyrosine phosphorylation of Stat1 protein	3	0.365408	0.0851746	ENSSSCT00000010953, ENSSSCT00000008144, ENSSSCT00000000519, ENSSSCT00000036052	566	10	11368	6.02544	1	0.964174	78.3239
GOTERM_BP_DIRECT	GO:0019731~antibacterial humoral response	3	0.365408	0.0851746	ENSSSCT00000031972, ENSSSCT00000024303, ENSSSCT00000014648	566	10	11368	6.02544	1	0.964174	78.3239
GOTERM_BP_DIRECT	GO:0021772~olfactory bulb development	3	0.365408	0.0851746	ENSSSCT00000009458, ENSSSCT00000022342, ENSSSCT00000017371	566	10	11368	6.02544	1	0.964174	78.3239
GOTERM_BP_DIRECT	GO:0045921~positive regulation of exocytosis	3	0.365408	0.0851746	ENSSSCT00000035348, ENSSSCT00000018101, ENSSSCT00000018085	566	10	11368	6.02544	1	0.964174	78.3239
GOTERM_BP_DIRECT	GO:0019229~regulation of vasoconstriction	3	0.365408	0.0851746	ENSSSCT00000011625, ENSSSCT00000007004, ENSSSCT00000012803	566	10	11368	6.02544	1	0.964174	78.3239
GOTERM_BP_DIRECT	GO:0000226~microtubule cytoskeleton organization	5	0.609013	0.0863507	ENSSSCT00000030549, ENSSSCT00000000756, ENSSSCT00000014652, ENSSSCT00000016213, ENSSSCT00000033337	566	34	11368	2.95365	1	0.963653	78.7975
GOTERM_BP_DIRECT	GO:0006629~lipid metabolic process	6	0.730816	0.0884855	ENSSSCT00000006747, ENSSSCT00000018418, ENSSSCT00000033890, ENSSSCT00000013058, ENSSSCT00000012943, ENSSSCT00000018060, ENSSSCT00000036048	566	48	11368	2.5106	1	0.964517	79.6325
GOTERM_BP_DIRECT	GO:0072593~reactive oxygen species metabolic process	4	0.487211	0.0933409	ENSSSCT00000019664, ENSSSCT00000004631, ENSSSCT00000029514, ENSSSCT00000005811	566	22	11368	3.65178	1	0.968824	81.4177
GOTERM_BP_DIRECT	GO:0008344~adult locomotory behavior	5	0.609013	0.0938589	ENSSSCT00000009458, ENSSSCT00000010401, ENSSSCT00000017402, ENSSSCT00000006203, ENSSSCT00000007004	566	35	11368	2.86926	1	0.96752	81.5993
GOTERM_BP_DIRECT	GO:0006533~aspartate catabolic process	2	0.243605	0.0969358	ENSSSCT00000011527, ENSSSCT00000003097	566	2	11368	20.0848	1	0.969324	82.6434
GOTERM_BP_DIRECT	GO:0072604~interleukin-6 secretion	2	0.243605	0.0969358	ENSSSCT00000019325, ENSSSCT00000018060	566	2	11368	20.0848	1	0.969324	82.6434
GOTERM_BP_DIRECT	GO:0021893~cerebral cortex GABAergic interneuron fate commitment	2	0.243605	0.0969358	ENSSSCT00000017371, ENSSSCT00000017370	566	2	11368	20.0848	1	0.969324	82.6434
GOTERM_BP_DIRECT	GO:0052697~xenobiotic glucuronidation	2	0.243605	0.0969358	ENSSSCT00000017761, ENSSSCT00000017765	566	2	11368	20.0848	1	0.969324	82.6434
GOTERM_BP_DIRECT	GO:0021544~subpallium development	2	0.243605	0.0969358	ENSSSCT00000017371, ENSSSCT00000017370	566	2	11368	20.0848	1	0.969324	82.6434
GOTERM_BP_DIRECT	GO:0051902~negative regulation of mitochondrial depolarization	2	0.243605	0.0969358	ENSSSCT00000015132, ENSSSCT00000033397	566	2	11368	20.0848	1	0.969324	82.6434
GOTERM_BP_DIRECT	GO:0002291~T cell activation via T cell receptor contact with antigen bound to MHC molecule on antigen presenting cell	2	0.243605	0.0969358	ENSSSCT00000033971, ENSSSCT00000032707, ENSSSCT00000032601	566	2	11368	20.0848	1	0.969324	82.6434
GOTERM_BP_DIRECT	GO:0021882~regulation of transcription from RNA polymerase II promoter involved in forebrain neuron fate commitment	2	0.243605	0.0969358	ENSSSCT00000017371, ENSSSCT00000017370	566	2	11368	20.0848	1	0.969324	82.6434
GOTERM_BP_DIRECT	GO:0045608~negative regulation of auditory receptor cell differentiation	2	0.243605	0.0969358	ENSSSCT00000024788, ENSSSCT00000026743	566	2	11368	20.0848	1	0.969324	82.6434
GOTERM_BP_DIRECT	GO:0032310~prostaglandin secretion	2	0.243605	0.0969358	ENSSSCT00000019325, ENSSSCT00000018060	566	2	11368	20.0848	1	0.969324	82.6434
GOTERM_BP_DIRECT	GO:0035606~peptidyl-cysteine S-trans-nitrosylation	2	0.243605	0.0969358	ENSSSCT00000000756, ENSSSCT00000007217, ENSSSCT00000033945	566	2	11368	20.0848	1	0.969324	82.6434
GOTERM_BP_DIRECT	GO:0046331~lateral inhibition	2	0.243605	0.0969358	ENSSSCT00000024788, ENSSSCT00000026743	566	2	11368	20.0848	1	0.969324	82.6434
GOTERM_BP_DIRECT	GO:0071673~positive regulation of smooth muscle cell chemotaxis	2	0.243605	0.0969358	ENSSSCT00000004688, ENSSSCT00000034270, ENSSSCT00000034402, ENSSSCT00000001539, ENSSSCT00000033884	566	2	11368	20.0848	1	0.969324	82.6434
GOTERM_BP_DIRECT	GO:0006699~bile acid biosynthetic process	2	0.243605	0.0969358	ENSSSCT00000006836, ENSSSCT00000010870	566	2	11368	20.0848	1	0.969324	82.6434
GOTERM_BP_DIRECT	GO:0021589~cerebellum structural organization	2	0.243605	0.0969358	ENSSSCT00000006159, ENSSSCT00000004243	566	2	11368	20.0848	1	0.969324	82.6434

## Sheet: Cluster3
Supplemental Table S6 GO Biological Process enrichment analysis (Cluster3)
Category	Term	Count	%	PValue	Genes	List Total	Pop Hits	Pop Total	Fold Enrichment	Bonferroni	Benjamini	FDR
GOTERM_BP_DIRECT	GO:0007507~heart development	31	1.53999	1.22003e-07	ENSSSCT00000036612, ENSSSCT00000011622, ENSSSCT00000015550, ENSSSCT00000009559, ENSSSCT00000023255, ENSSSCT00000034224, ENSSSCT00000004101, ENSSSCT00000008789, ENSSSCT00000018929, ENSSSCT00000009741, ENSSSCT00000022448, ENSSSCT00000026225, ENSSSCT00000002222, ENSSSCT00000017133, ENSSSCT00000036513, ENSSSCT00000003903, ENSSSCT00000005143, ENSSSCT00000013132, ENSSSCT00000009890, ENSSSCT00000013134,…	1369	91	11368	2.82879	0.00042436	0.00042436	0.000223312
GOTERM_BP_DIRECT	GO:0007156~homophilic cell adhesion via plasma membrane adhesion molecules	23	1.14257	2.26803e-05	ENSSSCT00000016292, ENSSSCT00000024230, ENSSSCT00000018773, ENSSSCT00000015733, ENSSSCT00000033448, ENSSSCT00000018600, ENSSSCT00000000728, ENSSSCT00000007028, ENSSSCT00000009590, ENSSSCT00000007009, ENSSSCT00000024809, ENSSSCT00000023372, ENSSSCT00000025039, ENSSSCT00000022933, ENSSSCT00000012771, ENSSSCT00000033473, ENSSSCT00000006698, ENSSSCT00000030174, ENSSSCT00000034236, ENSSSCT00000018292,…	1369	72	11368	2.65263	0.0758729	0.0386847	0.0415053
GOTERM_BP_DIRECT	GO:0030199~collagen fibril organization	12	0.596125	2.50253e-05	ENSSSCT00000015550, ENSSSCT00000007510, ENSSSCT00000005307, ENSSSCT00000034155, ENSSSCT00000006323, ENSSSCT00000016639, ENSSSCT00000017459, ENSSSCT00000011264, ENSSSCT00000006946, ENSSSCT00000001000, ENSSSCT00000022836, ENSSSCT00000011243	1369	23	11368	4.33245	0.0833817	0.0286043	0.0457958
GOTERM_BP_DIRECT	GO:0060045~positive regulation of cardiac muscle cell proliferation	9	0.447094	6.6202e-05	ENSSSCT00000004668, ENSSSCT00000033224, ENSSSCT00000015453, ENSSSCT00000004101, ENSSSCT00000010815, ENSSSCT00000036589, ENSSSCT00000006627, ENSSSCT00000018104, ENSSSCT00000034595, ENSSSCT00000018141, ENSSSCT00000009139	1369	14	11368	5.3382	0.205724	0.0559547	0.121105
GOTERM_BP_DIRECT	GO:0007155~cell adhesion	31	1.53999	0.000163202	ENSSSCT00000027981, ENSSSCT00000006212, ENSSSCT00000016411, ENSSSCT00000000855, ENSSSCT00000034031, ENSSSCT00000029971, ENSSSCT00000005288, ENSSSCT00000018018, ENSSSCT00000032588, ENSSSCT00000036262, ENSSSCT00000033911, ENSSSCT00000036145, ENSSSCT00000015441, ENSSSCT00000010552, ENSSSCT00000034881, ENSSSCT00000022933, ENSSSCT00000008545, ENSSSCT00000018895, ENSSSCT00000034686, ENSSSCT00000033299,…	1369	126	11368	2.04302	0.433243	0.107354	0.298299
GOTERM_BP_DIRECT	GO:0007160~cell-matrix adhesion	16	0.794834	0.000200839	ENSSSCT00000032235, ENSSSCT00000018842, ENSSSCT00000034686, ENSSSCT00000012090, ENSSSCT00000035682, ENSSSCT00000003399, ENSSSCT00000018391, ENSSSCT00000010116, ENSSSCT00000017459, ENSSSCT00000005546, ENSSSCT00000005473, ENSSSCT00000032891, ENSSSCT00000035294, ENSSSCT00000016625, ENSSSCT00000032798, ENSSSCT00000007515, ENSSSCT00000034881, ENSSSCT00000017406, ENSSSCT00000008545, ENSSSCT00000018895	1369	46	11368	2.8883	0.502813	0.109939	0.366972
GOTERM_BP_DIRECT	GO:0007157~heterophilic cell-cell adhesion via plasma membrane cell adhesion molecules	12	0.596125	0.000224222	ENSSSCT00000006891, ENSSSCT00000015048, ENSSSCT00000029167, ENSSSCT00000034236, ENSSSCT00000000314, ENSSSCT00000034662, ENSSSCT00000018530, ENSSSCT00000013057, ENSSSCT00000007515, ENSSSCT00000007028, ENSSSCT00000024809, ENSSSCT00000025039, ENSSSCT00000022933, ENSSSCT00000008545	1369	28	11368	3.5588	0.541666	0.105465	0.409616
GOTERM_BP_DIRECT	GO:0060413~atrial septum morphogenesis	7	0.34774	0.000410008	ENSSSCT00000018039, ENSSSCT00000004668, ENSSSCT00000017849, ENSSSCT00000007349, ENSSSCT00000010815, ENSSSCT00000007335, ENSSSCT00000018141	1369	10	11368	5.81271	0.759902	0.163341	0.747811
GOTERM_BP_DIRECT	GO:0034375~high-density lipoprotein particle remodeling	7	0.34774	0.000410008	ENSSSCT00000029031, ENSSSCT00000006964, ENSSSCT00000016435, ENSSSCT00000016436, ENSSSCT00000003426, ENSSSCT00000001547, ENSSSCT00000023900	1369	10	11368	5.81271	0.759902	0.163341	0.747811
GOTERM_BP_DIRECT	GO:0007411~axon guidance	20	0.993542	0.000655043	ENSSSCT00000007750, ENSSSCT00000012455, ENSSSCT00000013132, ENSSSCT00000035859, ENSSSCT00000013134, ENSSSCT00000033263, ENSSSCT00000034158, ENSSSCT00000002687, ENSSSCT00000008786, ENSSSCT00000026658, ENSSSCT00000034895, ENSSSCT00000023714, ENSSSCT00000013840, ENSSSCT00000002150, ENSSSCT00000031898, ENSSSCT00000002697, ENSSSCT00000017133, ENSSSCT00000019532, ENSSSCT00000028724, ENSSSCT00000009048,…	1369	72	11368	2.30663	0.897679	0.22376	1.1922
GOTERM_BP_DIRECT	GO:0030198~extracellular matrix organization	15	0.745156	0.000716985	ENSSSCT00000006953, ENSSSCT00000016895, ENSSSCT00000034968, ENSSSCT00000012090, ENSSSCT00000002960, ENSSSCT00000010116, ENSSSCT00000006149, ENSSSCT00000018347, ENSSSCT00000013052, ENSSSCT00000009362, ENSSSCT00000005877, ENSSSCT00000009303, ENSSSCT00000000011, ENSSSCT00000022465, ENSSSCT00000004699, ENSSSCT00000033974, ENSSSCT00000018780, ENSSSCT00000010258	1369	46	11368	2.70778	0.917527	0.220832	1.30424
GOTERM_BP_DIRECT	GO:0051965~positive regulation of synapse assembly	13	0.645802	0.000908383	ENSSSCT00000034972, ENSSSCT00000007750, ENSSSCT00000010403, ENSSSCT00000003918, ENSSSCT00000015048, ENSSSCT00000033891, ENSSSCT00000014561, ENSSSCT00000036350, ENSSSCT00000002687, ENSSSCT00000032669, ENSSSCT00000013649, ENSSSCT00000004924, ENSSSCT00000013689, ENSSSCT00000018130, ENSSSCT00000035620, ENSSSCT00000012771, ENSSSCT00000033368	1369	37	11368	2.91758	0.957646	0.249809	1.64968
GOTERM_BP_DIRECT	GO:0009952~anterior/posterior pattern specification	16	0.794834	0.00134162	ENSSSCT00000018039, ENSSSCT00000019087, ENSSSCT00000019094, ENSSSCT00000019093, ENSSSCT00000019090, ENSSSCT00000034069, ENSSSCT00000019091, ENSSSCT00000018184, ENSSSCT00000031984, ENSSSCT00000017403, ENSSSCT00000017849, ENSSSCT00000000306, ENSSSCT00000017133, ENSSSCT00000000801, ENSSSCT00000017406, ENSSSCT00000032524	1369	54	11368	2.46041	0.990634	0.322415	2.42738
GOTERM_BP_DIRECT	GO:0007169~transmembrane receptor protein tyrosine kinase signaling pathway	15	0.745156	0.00142767	ENSSSCT00000013276, ENSSSCT00000006275, ENSSSCT00000035030, ENSSSCT00000000777, ENSSSCT00000034530, ENSSSCT00000033248, ENSSSCT00000014561, ENSSSCT00000004605, ENSSSCT00000004884, ENSSSCT00000032652, ENSSSCT00000014815, ENSSSCT00000006748, ENSSSCT00000003972, ENSSSCT00000035136, ENSSSCT00000010515, ENSSSCT00000001504, ENSSSCT00000004218, ENSSSCT00000018518, ENSSSCT00000010535	1369	49	11368	2.542	0.99306	0.317737	2.58115
GOTERM_BP_DIRECT	GO:0043691~reverse cholesterol transport	7	0.34774	0.00145595	ENSSSCT00000029031, ENSSSCT00000006964, ENSSSCT00000016436, ENSSSCT00000003426, ENSSSCT00000001547, ENSSSCT00000023900, ENSSSCT00000010869	1369	12	11368	4.84393	0.993711	0.303765	2.63163
GOTERM_BP_DIRECT	GO:0007596~blood coagulation	12	0.596125	0.00150931	ENSSSCT00000009854, ENSSSCT00000019488, ENSSSCT00000014473, ENSSSCT00000010075, ENSSSCT00000004466, ENSSSCT00000010477, ENSSSCT00000026256, ENSSSCT00000017457, ENSSSCT00000027504, ENSSSCT00000035671, ENSSSCT00000013897, ENSSSCT00000006892	1369	34	11368	2.93078	0.994778	0.29554	2.72682
GOTERM_BP_DIRECT	GO:0007229~integrin-mediated signaling pathway	15	0.745156	0.00176713	ENSSSCT00000006698, ENSSSCT00000034686, ENSSSCT00000018842, ENSSSCT00000009142, ENSSSCT00000012090, ENSSSCT00000035682, ENSSSCT00000018391, ENSSSCT00000016436, ENSSSCT00000017459, ENSSSCT00000017431, ENSSSCT00000005473, ENSSSCT00000000314, ENSSSCT00000032891, ENSSSCT00000035294, ENSSSCT00000014254, ENSSSCT00000003972, ENSSSCT00000032798, ENSSSCT00000008545, ENSSSCT00000018895	1369	50	11368	2.49116	0.997873	0.319263	3.18552
GOTERM_BP_DIRECT	GO:0007528~neuromuscular junction development	7	0.34774	0.00243016	ENSSSCT00000012492, ENSSSCT00000012084, ENSSSCT00000012455, ENSSSCT00000010462, ENSSSCT00000012609, ENSSSCT00000000849, ENSSSCT00000010673	1369	13	11368	4.47132	0.999789	0.392212	4.35579
GOTERM_BP_DIRECT	GO:0090190~positive regulation of branching involved in ureteric bud morphogenesis	7	0.34774	0.00243016	ENSSSCT00000018039, ENSSSCT00000034178, ENSSSCT00000035384, ENSSSCT00000005307, ENSSSCT00000007426, ENSSSCT00000005607, ENSSSCT00000018780, ENSSSCT00000033929	1369	13	11368	4.47132	0.999789	0.392212	4.35579
GOTERM_BP_DIRECT	GO:0035556~intracellular signal transduction	40	1.98708	0.00280303	ENSSSCT00000034178, ENSSSCT00000036612, ENSSSCT00000031208, ENSSSCT00000033248, ENSSSCT00000034224, ENSSSCT00000017511, ENSSSCT00000013458, ENSSSCT00000033926, ENSSSCT00000009679, ENSSSCT00000017384, ENSSSCT00000009706, ENSSSCT00000022448, ENSSSCT00000011882, ENSSSCT00000010822, ENSSSCT00000029871, ENSSSCT00000036209, ENSSSCT00000035165, ENSSSCT00000029499, ENSSSCT00000013276, ENSSSCT00000019177,…	1369	207	11368	1.60461	0.999943	0.418721	5.00805
GOTERM_BP_DIRECT	GO:0001938~positive regulation of endothelial cell proliferation	12	0.596125	0.00321214	ENSSSCT00000036612, ENSSSCT00000000251, ENSSSCT00000018113, ENSSSCT00000016982, ENSSSCT00000014119, ENSSSCT00000036588, ENSSSCT00000034224, ENSSSCT00000033114, ENSSSCT00000036335, ENSSSCT00000006406, ENSSSCT00000034069, ENSSSCT00000027504, ENSSSCT00000005922, ENSSSCT00000022448, ENSSSCT00000010557, ENSSSCT00000005561, ENSSSCT00000009683	1369	37	11368	2.69315	0.999986	0.445177	5.71885
GOTERM_BP_DIRECT	GO:0042632~cholesterol homeostasis	11	0.546448	0.00327084	ENSSSCT00000029031, ENSSSCT00000006964, ENSSSCT00000033970, ENSSSCT00000000279, ENSSSCT00000016435, ENSSSCT00000016436, ENSSSCT00000003426, ENSSSCT00000029382, ENSSSCT00000001158, ENSSSCT00000003942, ENSSSCT00000023900	1369	32	11368	2.85446	0.999989	0.434415	5.82041
GOTERM_BP_DIRECT	GO:0050728~negative regulation of inflammatory response	14	0.695479	0.00351099	ENSSSCT00000034230, ENSSSCT00000016601, ENSSSCT00000016436, ENSSSCT00000000958, ENSSSCT00000026256, ENSSSCT00000005464, ENSSSCT00000026718, ENSSSCT00000000771, ENSSSCT00000011466, ENSSSCT00000028399, ENSSSCT00000003426, ENSSSCT00000003977, ENSSSCT00000000007, ENSSSCT00000030022, ENSSSCT00000033606	1369	48	11368	2.42196	0.999995	0.441599	6.23489
GOTERM_BP_DIRECT	GO:0042981~regulation of apoptotic process	25	1.24193	0.00368671	ENSSSCT00000034178, ENSSSCT00000035384, ENSSSCT00000000777, ENSSSCT00000033228, ENSSSCT00000022338, ENSSSCT00000033926, ENSSSCT00000004884, ENSSSCT00000036631, ENSSSCT00000000771, ENSSSCT00000033929, ENSSSCT00000002226, ENSSSCT00000028399, ENSSSCT00000011984, ENSSSCT00000012648, ENSSSCT00000025501, ENSSSCT00000009139, ENSSSCT00000008212, ENSSSCT00000016569, ENSSSCT00000007409, ENSSSCT00000011358,…	1369	113	11368	1.83714	0.999997	0.442381	6.53706
GOTERM_BP_DIRECT	GO:0042157~lipoprotein metabolic process	6	0.298063	0.00374502	ENSSSCT00000006964, ENSSSCT00000016435, ENSSSCT00000016436, ENSSSCT00000018228, ENSSSCT00000029382, ENSSSCT00000001547	1369	10	11368	4.98232	0.999998	0.433081	6.63714
GOTERM_BP_DIRECT	GO:0050919~negative chemotaxis	7	0.34774	0.00382335	ENSSSCT00000026339, ENSSSCT00000034686, ENSSSCT00000008978, ENSSSCT00000035294, ENSSSCT00000035682, ENSSSCT00000012478, ENSSSCT00000016773, ENSSSCT00000012520, ENSSSCT00000009048	1369	14	11368	4.15194	0.999998	0.426093	6.77141
GOTERM_BP_DIRECT	GO:0045429~positive regulation of nitric oxide biosynthetic process	7	0.34774	0.00382335	ENSSSCT00000028315, ENSSSCT00000036649, ENSSSCT00000010093, ENSSSCT00000032649, ENSSSCT00000007605, ENSSSCT00000010601, ENSSSCT00000012837, ENSSSCT00000018324	1369	14	11368	4.15194	0.999998	0.426093	6.77141
GOTERM_BP_DIRECT	GO:0048704~embryonic skeletal system morphogenesis	10	0.496771	0.00420884	ENSSSCT00000001801, ENSSSCT00000018184, ENSSSCT00000019087, ENSSSCT00000007510, ENSSSCT00000017403, ENSSSCT00000005607, ENSSSCT00000019094, ENSSSCT00000019093, ENSSSCT00000017406, ENSSSCT00000019091	1369	28	11368	2.96567	1	0.443973	7.42954
GOTERM_BP_DIRECT	GO:0001666~response to hypoxia	15	0.745156	0.00461898	ENSSSCT00000036389, ENSSSCT00000009890, ENSSSCT00000034915, ENSSSCT00000011287, ENSSSCT00000005464, ENSSSCT00000036160, ENSSSCT00000036484, ENSSSCT00000002938, ENSSSCT00000008413, ENSSSCT00000012797, ENSSSCT00000011103, ENSSSCT00000003811, ENSSSCT00000022773, ENSSSCT00000003440, ENSSSCT00000010673, ENSSSCT00000035620, ENSSSCT00000034765, ENSSSCT00000007282, ENSSSCT00000013502, ENSSSCT00000003285	1369	55	11368	2.26469	1	0.46178	8.12493
GOTERM_BP_DIRECT	GO:0016525~negative regulation of angiogenesis	11	0.546448	0.00531503	ENSSSCT00000036581, ENSSSCT00000034520, ENSSSCT00000012913, ENSSSCT00000010463, ENSSSCT00000005009, ENSSSCT00000005288, ENSSSCT00000005647, ENSSSCT00000033097, ENSSSCT00000018184, ENSSSCT00000019290, ENSSSCT00000000999, ENSSSCT00000013557, ENSSSCT00000017154, ENSSSCT00000036505	1369	34	11368	2.68655	1	0.496755	9.29379
GOTERM_BP_DIRECT	GO:0042730~fibrinolysis	5	0.248385	0.00540852	ENSSSCT00000019488, ENSSSCT00000014473, ENSSSCT00000011287, ENSSSCT00000004466, ENSSSCT00000034155	1369	7	11368	5.93134	1	0.490249	9.44972
GOTERM_BP_DIRECT	GO:0018149~peptide cross-linking	7	0.34774	0.00573057	ENSSSCT00000005206, ENSSSCT00000034520, ENSSSCT00000017459, ENSSSCT00000005288, ENSSSCT00000005802, ENSSSCT00000005204, ENSSSCT00000035671, ENSSSCT00000017610	1369	15	11368	3.87514	1	0.498147	9.98488
GOTERM_BP_DIRECT	GO:0061045~negative regulation of wound healing	4	0.198708	0.0063304	ENSSSCT00000004956, ENSSSCT00000005464, ENSSSCT00000026718, ENSSSCT00000035253, ENSSSCT00000013399, ENSSSCT00000035901	1369	4	11368	8.30387	1	0.521189	10.9737
GOTERM_BP_DIRECT	GO:0003184~pulmonary valve morphogenesis	4	0.198708	0.0063304	ENSSSCT00000007738, ENSSSCT00000004668, ENSSSCT00000007349, ENSSSCT00000023745	1369	4	11368	8.30387	1	0.521189	10.9737
GOTERM_BP_DIRECT	GO:0050798~activated T cell proliferation	4	0.198708	0.0063304	ENSSSCT00000006275, ENSSSCT00000017937, ENSSSCT00000035136, ENSSSCT00000004884, ENSSSCT00000012267	1369	4	11368	8.30387	1	0.521189	10.9737
GOTERM_BP_DIRECT	GO:0008217~regulation of blood pressure	9	0.447094	0.00707486	ENSSSCT00000000251, ENSSSCT00000010390, ENSSSCT00000009890, ENSSSCT00000015483, ENSSSCT00000015539, ENSSSCT00000011432, ENSSSCT00000018929, ENSSSCT00000006084, ENSSSCT00000009706	1369	25	11368	2.98939	1	0.549233	12.1866
GOTERM_BP_DIRECT	GO:0001525~angiogenesis	21	1.04322	0.00746393	ENSSSCT00000018809, ENSSSCT00000033224, ENSSSCT00000003918, ENSSSCT00000034155, ENSSSCT00000019064, ENSSSCT00000018929, ENSSSCT00000007335, ENSSSCT00000029853, ENSSSCT00000035626, ENSSSCT00000017154, ENSSSCT00000016569, ENSSSCT00000034686, ENSSSCT00000000251, ENSSSCT00000002072, ENSSSCT00000035682, ENSSSCT00000027848, ENSSSCT00000036589, ENSSSCT00000034317, ENSSSCT00000016403, ENSSSCT00000014853,…	1369	94	11368	1.85512	1	0.557145	12.8143
GOTERM_BP_DIRECT	GO:0001570~vasculogenesis	11	0.546448	0.00824249	ENSSSCT00000018039, ENSSSCT00000004668, ENSSSCT00000013569, ENSSSCT00000030363, ENSSSCT00000006627, ENSSSCT00000018929, ENSSSCT00000009999, ENSSSCT00000023343, ENSSSCT00000017775, ENSSSCT00000033097, ENSSSCT00000023329	1369	36	11368	2.53729	1	0.582119	14.0577
GOTERM_BP_DIRECT	GO:0071526~semaphorin-plexin signaling pathway	7	0.34774	0.00824819	ENSSSCT00000026339, ENSSSCT00000008978, ENSSSCT00000012478, ENSSSCT00000005149, ENSSSCT00000016773, ENSSSCT00000012520, ENSSSCT00000009048	1369	16	11368	3.63294	1	0.571508	14.0667
GOTERM_BP_DIRECT	GO:0007219~Notch signaling pathway	15	0.745156	0.00893017	ENSSSCT00000010501, ENSSSCT00000000958, ENSSSCT00000003046, ENSSSCT00000004668, ENSSSCT00000011882, ENSSSCT00000017859, ENSSSCT00000007349, ENSSSCT00000024966, ENSSSCT00000001593, ENSSSCT00000005046, ENSSSCT00000017406, ENSSSCT00000018780, ENSSSCT00000034111, ENSSSCT00000028161, ENSSSCT00000023745	1369	59	11368	2.11115	1	0.59002	15.1419
GOTERM_BP_DIRECT	GO:0035584~calcium-mediated signaling using intracellular calcium source	6	0.298063	0.00957264	ENSSSCT00000006891, ENSSSCT00000036588, ENSSSCT00000002020, ENSSSCT00000007515, ENSSSCT00000011103, ENSSSCT00000036335, ENSSSCT00000009683, ENSSSCT00000010536	1369	12	11368	4.15194	1	0.605267	16.1432
GOTERM_BP_DIRECT	GO:0019370~leukotriene biosynthetic process	5	0.248385	0.00979224	ENSSSCT00000033520, ENSSSCT00000031208, ENSSSCT00000010224, ENSSSCT00000035111, ENSSSCT00000011016, ENSSSCT00000024428	1369	8	11368	5.18992	1	0.603577	16.4828
GOTERM_BP_DIRECT	GO:0033690~positive regulation of osteoblast proliferation	5	0.248385	0.00979224	ENSSSCT00000018842, ENSSSCT00000034686, ENSSSCT00000035294, ENSSSCT00000006275, ENSSSCT00000035682, ENSSSCT00000023255, ENSSSCT00000032798, ENSSSCT00000010116	1369	8	11368	5.18992	1	0.603577	16.4828
GOTERM_BP_DIRECT	GO:0048812~neuron projection morphogenesis	9	0.447094	0.0116766	ENSSSCT00000024420, ENSSSCT00000000777, ENSSSCT00000010578, ENSSSCT00000018933, ENSSSCT00000017041, ENSSSCT00000030260, ENSSSCT00000030909, ENSSSCT00000014561, ENSSSCT00000000849	1369	27	11368	2.76796	1	0.658811	19.3446
GOTERM_BP_DIRECT	GO:0001658~branching involved in ureteric bud morphogenesis	9	0.447094	0.0116766	ENSSSCT00000029331, ENSSSCT00000010093, ENSSSCT00000013862, ENSSSCT00000005307, ENSSSCT00000005561, ENSSSCT00000005607, ENSSSCT00000018627, ENSSSCT00000018780, ENSSSCT00000025039	1369	27	11368	2.76796	1	0.658811	19.3446
GOTERM_BP_DIRECT	GO:0006749~glutathione metabolic process	8	0.397417	0.011963	ENSSSCT00000033132, ENSSSCT00000034256, ENSSSCT00000019460, ENSSSCT00000011025, ENSSSCT00000011016, ENSSSCT00000011607, ENSSSCT00000007970, ENSSSCT00000002915, ENSSSCT00000034894	1369	22	11368	3.01959	1	0.658223	19.7712
GOTERM_BP_DIRECT	GO:0001755~neural crest cell migration	10	0.496771	0.0135317	ENSSSCT00000018039, ENSSSCT00000026339, ENSSSCT00000008978, ENSSSCT00000027524, ENSSSCT00000010390, ENSSSCT00000012478, ENSSSCT00000005149, ENSSSCT00000016773, ENSSSCT00000012520, ENSSSCT00000009048	1369	33	11368	2.51632	1	0.694239	22.0709
GOTERM_BP_DIRECT	GO:0002092~positive regulation of receptor internalization	6	0.298063	0.0140367	ENSSSCT00000035645, ENSSSCT00000000777, ENSSSCT00000032774, ENSSSCT00000005307, ENSSSCT00000004605, ENSSSCT00000029382, ENSSSCT00000034881, ENSSSCT00000036178, ENSSSCT00000032678	1369	13	11368	3.83256	1	0.698656	22.798
GOTERM_BP_DIRECT	GO:0048668~collateral sprouting	4	0.198708	0.0144097	ENSSSCT00000027524, ENSSSCT00000006275, ENSSSCT00000014561, ENSSSCT00000022405	1369	5	11368	6.6431	1	0.699494	23.3308
GOTERM_BP_DIRECT	GO:0051901~positive regulation of mitochondrial depolarization	4	0.198708	0.0144097	ENSSSCT00000000999, ENSSSCT00000010760, ENSSSCT00000036588, ENSSSCT00000036335, ENSSSCT00000009683, ENSSSCT00000031135	1369	5	11368	6.6431	1	0.699494	23.3308
GOTERM_BP_DIRECT	GO:0010763~positive regulation of fibroblast migration	4	0.198708	0.0144097	ENSSSCT00000018842, ENSSSCT00000034520, ENSSSCT00000032798, ENSSSCT00000005288, ENSSSCT00000006946, ENSSSCT00000010536	1369	5	11368	6.6431	1	0.699494	23.3308
GOTERM_BP_DIRECT	GO:0034446~substrate adhesion-dependent cell spreading	9	0.447094	0.0146638	ENSSSCT00000034686, ENSSSCT00000036581, ENSSSCT00000035294, ENSSSCT00000014254, ENSSSCT00000009134, ENSSSCT00000006275, ENSSSCT00000012090, ENSSSCT00000035682, ENSSSCT00000017431, ENSSSCT00000005647, ENSSSCT00000002094, ENSSSCT00000017610	1369	28	11368	2.6691	1	0.697352	23.6917
GOTERM_BP_DIRECT	GO:0048813~dendrite morphogenesis	7	0.34774	0.0154884	ENSSSCT00000010403, ENSSSCT00000033704, ENSSSCT00000035136, ENSSSCT00000000160, ENSSSCT00000004884, ENSSSCT00000023102, ENSSSCT00000006679, ENSSSCT00000005763	1369	18	11368	3.22928	1	0.708939	24.8523
GOTERM_BP_DIRECT	GO:0000902~cell morphogenesis	11	0.546448	0.0176308	ENSSSCT00000009841, ENSSSCT00000036649, ENSSSCT00000010760, ENSSSCT00000024745, ENSSSCT00000010601, ENSSSCT00000033431, ENSSSCT00000001163, ENSSSCT00000018530, ENSSSCT00000005206, ENSSSCT00000019488, ENSSSCT00000016284, ENSSSCT00000007121, ENSSSCT00000011436	1369	40	11368	2.28356	1	0.747216	27.7898
GOTERM_BP_DIRECT	GO:0030512~negative regulation of transforming growth factor beta receptor signaling pathway	9	0.447094	0.0181689	ENSSSCT00000009671, ENSSSCT00000018113, ENSSSCT00000009543, ENSSSCT00000004956, ENSSSCT00000004699, ENSSSCT00000032434, ENSSSCT00000027262, ENSSSCT00000028852, ENSSSCT00000011709, ENSSSCT00000035901	1369	29	11368	2.57706	1	0.750117	28.5104
GOTERM_BP_DIRECT	GO:0003151~outflow tract morphogenesis	8	0.397417	0.019602	ENSSSCT00000004668, ENSSSCT00000005561, ENSSSCT00000005607, ENSSSCT00000015453, ENSSSCT00000007335, ENSSSCT00000003285, ENSSSCT00000023745, ENSSSCT00000012688	1369	24	11368	2.76796	1	0.769008	30.3963
GOTERM_BP_DIRECT	GO:0061036~positive regulation of cartilage development	5	0.248385	0.02411	ENSSSCT00000005561, ENSSSCT00000034069, ENSSSCT00000018780, ENSSSCT00000010546, ENSSSCT00000009139	1369	10	11368	4.15194	1	0.829477	36.0271
GOTERM_BP_DIRECT	GO:0070509~calcium ion import	5	0.248385	0.02411	ENSSSCT00000012084, ENSSSCT00000019117, ENSSSCT00000010259, ENSSSCT00000035253, ENSSSCT00000013399, ENSSSCT00000018233	1369	10	11368	4.15194	1	0.829477	36.0271
GOTERM_BP_DIRECT	GO:0042511~positive regulation of tyrosine phosphorylation of Stat1 protein	5	0.248385	0.02411	ENSSSCT00000015977, ENSSSCT00000033606, ENSSSCT00000018422, ENSSSCT00000009679, ENSSSCT00000032689, ENSSSCT00000000771	1369	10	11368	4.15194	1	0.829477	36.0271
GOTERM_BP_DIRECT	GO:0030513~positive regulation of BMP signaling pathway	8	0.397417	0.0244736	ENSSSCT00000027047, ENSSSCT00000000251, ENSSSCT00000013862, ENSSSCT00000006137, ENSSSCT00000005561, ENSSSCT00000002150, ENSSSCT00000004101, ENSSSCT00000018044, ENSSSCT00000034069	1369	25	11368	2.65724	1	0.827825	36.462
GOTERM_BP_DIRECT	GO:0030168~platelet activation	7	0.34774	0.02623	ENSSSCT00000009854, ENSSSCT00000000262, ENSSSCT00000014473, ENSSSCT00000026223, ENSSSCT00000012913, ENSSSCT00000009855, ENSSSCT00000009856	1369	20	11368	2.90636	1	0.842676	38.5235
GOTERM_BP_DIRECT	GO:0048843~negative regulation of axon extension involved in axon guidance	7	0.34774	0.02623	ENSSSCT00000026339, ENSSSCT00000008978, ENSSSCT00000012478, ENSSSCT00000005149, ENSSSCT00000016773, ENSSSCT00000012520, ENSSSCT00000009048	1369	20	11368	2.90636	1	0.842676	38.5235
GOTERM_BP_DIRECT	GO:0035987~endodermal cell differentiation	7	0.34774	0.02623	ENSSSCT00000012432, ENSSSCT00000034686, ENSSSCT00000035294, ENSSSCT00000007510, ENSSSCT00000035682, ENSSSCT00000010463, ENSSSCT00000017431, ENSSSCT00000000314, ENSSSCT00000017610	1369	20	11368	2.90636	1	0.842676	38.5235
GOTERM_BP_DIRECT	GO:1903660~negative regulation of complement-dependent cytotoxicity	4	0.198708	0.0262577	ENSSSCT00000000461, ENSSSCT00000033248, ENSSSCT00000011084, ENSSSCT00000000443, ENSSSCT00000032652	1369	6	11368	5.53591	1	0.837182	38.5555
GOTERM_BP_DIRECT	GO:0010873~positive regulation of cholesterol esterification	4	0.198708	0.0262577	ENSSSCT00000035119, ENSSSCT00000006964, ENSSSCT00000016436, ENSSSCT00000003426	1369	6	11368	5.53591	1	0.837182	38.5555
GOTERM_BP_DIRECT	GO:0032963~collagen metabolic process	4	0.198708	0.0262577	ENSSSCT00000010760, ENSSSCT00000025559, ENSSSCT00000012925, ENSSSCT00000000742	1369	6	11368	5.53591	1	0.837182	38.5555
GOTERM_BP_DIRECT	GO:0035385~Roundabout signaling pathway	4	0.198708	0.0262577	ENSSSCT00000013132, ENSSSCT00000013134, ENSSSCT00000009572, ENSSSCT00000016639	1369	6	11368	5.53591	1	0.837182	38.5555
GOTERM_BP_DIRECT	GO:0006953~acute-phase response	6	0.298063	0.0267009	ENSSSCT00000012534, ENSSSCT00000014473, ENSSSCT00000012911, ENSSSCT00000031147, ENSSSCT00000003046, ENSSSCT00000006034	1369	15	11368	3.32155	1	0.836456	39.0654
GOTERM_BP_DIRECT	GO:0048741~skeletal muscle fiber development	6	0.298063	0.0267009	ENSSSCT00000018039, ENSSSCT00000017936, ENSSSCT00000018113, ENSSSCT00000010673, ENSSSCT00000003285, ENSSSCT00000025659	1369	15	11368	3.32155	1	0.836456	39.0654
GOTERM_BP_DIRECT	GO:0002053~positive regulation of mesenchymal cell proliferation	6	0.298063	0.0267009	ENSSSCT00000018039, ENSSSCT00000018117, ENSSSCT00000033224, ENSSSCT00000022487, ENSSSCT00000036589, ENSSSCT00000018104, ENSSSCT00000018780, ENSSSCT00000034595	1369	15	11368	3.32155	1	0.836456	39.0654
GOTERM_BP_DIRECT	GO:0007417~central nervous system development	9	0.447094	0.0269028	ENSSSCT00000031984, ENSSSCT00000033299, ENSSSCT00000023723, ENSSSCT00000015441, ENSSSCT00000017233, ENSSSCT00000035136, ENSSSCT00000004605, ENSSSCT00000007094, ENSSSCT00000004884, ENSSSCT00000035607, ENSSSCT00000026121, ENSSSCT00000032588	1369	31	11368	2.4108	1	0.833062	39.2964
GOTERM_BP_DIRECT	GO:0010951~negative regulation of endopeptidase activity	8	0.397417	0.0301146	ENSSSCT00000012534, ENSSSCT00000005877, ENSSSCT00000002750, ENSSSCT00000015480, ENSSSCT00000012911, ENSSSCT00000012179, ENSSSCT00000002749, ENSSSCT00000033796, ENSSSCT00000013426	1369	26	11368	2.55504	1	0.860539	42.8608
GOTERM_BP_DIRECT	GO:0007010~cytoskeleton organization	12	0.596125	0.0327712	ENSSSCT00000027728, ENSSSCT00000012066, ENSSSCT00000009877, ENSSSCT00000018933, ENSSSCT00000000201, ENSSSCT00000024745, ENSSSCT00000018037, ENSSSCT00000012064, ENSSSCT00000025400, ENSSSCT00000013301, ENSSSCT00000019290, ENSSSCT00000033778, ENSSSCT00000031898, ENSSSCT00000016776, ENSSSCT00000018780, ENSSSCT00000007732	1369	50	11368	1.99293	1	0.878478	45.6587
GOTERM_BP_DIRECT	GO:0043588~skin development	7	0.34774	0.0330895	ENSSSCT00000010403, ENSSSCT00000008812, ENSSSCT00000006323, ENSSSCT00000009848, ENSSSCT00000033980, ENSSSCT00000017459, ENSSSCT00000034559, ENSSSCT00000022836, ENSSSCT00000034106, ENSSSCT00000003285	1369	21	11368	2.76796	1	0.87637	45.985
GOTERM_BP_DIRECT	GO:0007416~synapse assembly	7	0.34774	0.0330895	ENSSSCT00000027728, ENSSSCT00000007750, ENSSSCT00000018773, ENSSSCT00000014561, ENSSSCT00000025400, ENSSSCT00000016776, ENSSSCT00000023619, ENSSSCT00000035620, ENSSSCT00000012688	1369	21	11368	2.76796	1	0.87637	45.985
GOTERM_BP_DIRECT	GO:0034220~ion transmembrane transport	7	0.34774	0.0330895	ENSSSCT00000019117, ENSSSCT00000027286, ENSSSCT00000030363, ENSSSCT00000000226, ENSSSCT00000012032, ENSSSCT00000030528, ENSSSCT00000012033	1369	21	11368	2.76796	1	0.87637	45.985
GOTERM_BP_DIRECT	GO:0007224~smoothened signaling pathway	10	0.496771	0.033107	ENSSSCT00000018039, ENSSSCT00000009905, ENSSSCT00000000478, ENSSSCT00000009559, ENSSSCT00000017001, ENSSSCT00000005561, ENSSSCT00000023714, ENSSSCT00000010515, ENSSSCT00000028161, ENSSSCT00000011484	1369	38	11368	2.18523	1	0.871894	46.0029
GOTERM_BP_DIRECT	GO:0042523~positive regulation of tyrosine phosphorylation of Stat5 protein	5	0.248385	0.0343497	ENSSSCT00000018809, ENSSSCT00000008413, ENSSSCT00000035136, ENSSSCT00000000936, ENSSSCT00000004884, ENSSSCT00000009679	1369	11	11368	3.77449	1	0.877127	47.2591
GOTERM_BP_DIRECT	GO:0001958~endochondral ossification	6	0.298063	0.0350885	ENSSSCT00000016162, ENSSSCT00000036388, ENSSSCT00000005561, ENSSSCT00000008239, ENSSSCT00000015453, ENSSSCT00000034146, ENSSSCT00000034043, ENSSSCT00000006725, ENSSSCT00000035506, ENSSSCT00000033800, ENSSSCT00000007100, ENSSSCT00000033029	1369	16	11368	3.11395	1	0.878301	47.9928
GOTERM_BP_DIRECT	GO:0048754~branching morphogenesis of an epithelial tube	6	0.298063	0.0350885	ENSSSCT00000026225, ENSSSCT00000008812, ENSSSCT00000009572, ENSSSCT00000017133, ENSSSCT00000023329, ENSSSCT00000008212	1369	16	11368	3.11395	1	0.878301	47.9928
GOTERM_BP_DIRECT	GO:0007613~memory	8	0.397417	0.0365679	ENSSSCT00000007727, ENSSSCT00000012090, ENSSSCT00000029012, ENSSSCT00000018432, ENSSSCT00000030846, ENSSSCT00000000314, ENSSSCT00000012668, ENSSSCT00000007732	1369	27	11368	2.46041	1	0.884682	49.4331
GOTERM_BP_DIRECT	GO:0045669~positive regulation of osteoblast differentiation	9	0.447094	0.0381852	ENSSSCT00000036388, ENSSSCT00000034069, ENSSSCT00000006946, ENSSSCT00000034043, ENSSSCT00000035506, ENSSSCT00000007738, ENSSSCT00000005561, ENSSSCT00000015453, ENSSSCT00000008239, ENSSSCT00000034146, ENSSSCT00000000936, ENSSSCT00000018422, ENSSSCT00000033800, ENSSSCT00000033029, ENSSSCT00000008212	1369	33	11368	2.26469	1	0.891443	50.9646
GOTERM_BP_DIRECT	GO:0001947~heart looping	9	0.447094	0.0381852	ENSSSCT00000018039, ENSSSCT00000010093, ENSSSCT00000017849, ENSSSCT00000015453, ENSSSCT00000004605, ENSSSCT00000005464, ENSSSCT00000028161, ENSSSCT00000018141, ENSSSCT00000010638	1369	33	11368	2.26469	1	0.891443	50.9646
GOTERM_BP_DIRECT	GO:0014068~positive regulation of phosphatidylinositol 3-kinase signaling	10	0.496771	0.0386076	ENSSSCT00000036581, ENSSSCT00000006891, ENSSSCT00000014473, ENSSSCT00000036588, ENSSSCT00000036335, ENSSSCT00000005647, ENSSSCT00000014517, ENSSSCT00000000999, ENSSSCT00000003972, ENSSSCT00000026225, ENSSSCT00000000936, ENSSSCT00000018780, ENSSSCT00000009683	1369	39	11368	2.1292	1	0.890224	51.3572
GOTERM_BP_DIRECT	GO:0035771~interleukin-4-mediated signaling pathway	3	0.149031	0.0399371	ENSSSCT00000000461, ENSSSCT00000033248, ENSSSCT00000000443, ENSSSCT00000032652	1369	3	11368	8.30387	1	0.89467	52.5738
GOTERM_BP_DIRECT	GO:0009436~glyoxylate catabolic process	3	0.149031	0.0399371	ENSSSCT00000017859, ENSSSCT00000018324, ENSSSCT00000011513	1369	3	11368	8.30387	1	0.89467	52.5738
GOTERM_BP_DIRECT	GO:0032489~regulation of Cdc42 protein signal transduction	3	0.149031	0.0399371	ENSSSCT00000016435, ENSSSCT00000016436, ENSSSCT00000003426	1369	3	11368	8.30387	1	0.89467	52.5738
GOTERM_BP_DIRECT	GO:0098910~regulation of atrial cardiac muscle cell action potential	3	0.149031	0.0399371	ENSSSCT00000009992, ENSSSCT00000011103, ENSSSCT00000007335	1369	3	11368	8.30387	1	0.89467	52.5738
GOTERM_BP_DIRECT	GO:0002317~plasma cell differentiation	3	0.149031	0.0399371	ENSSSCT00000033853, ENSSSCT00000032830, ENSSSCT00000011528, ENSSSCT00000000131	1369	3	11368	8.30387	1	0.89467	52.5738
GOTERM_BP_DIRECT	GO:0006559~L-phenylalanine catabolic process	3	0.149031	0.0399371	ENSSSCT00000033132, ENSSSCT00000029368, ENSSSCT00000010747	1369	3	11368	8.30387	1	0.89467	52.5738
GOTERM_BP_DIRECT	GO:0002682~regulation of immune system process	3	0.149031	0.0399371	ENSSSCT00000034256, ENSSSCT00000031147, ENSSSCT00000006034, ENSSSCT00000034894	1369	3	11368	8.30387	1	0.89467	52.5738
GOTERM_BP_DIRECT	GO:0010989~negative regulation of low-density lipoprotein particle clearance	3	0.149031	0.0399371	ENSSSCT00000016435, ENSSSCT00000029382, ENSSSCT00000001158	1369	3	11368	8.30387	1	0.89467	52.5738
GOTERM_BP_DIRECT	GO:0060018~astrocyte fate commitment	3	0.149031	0.0399371	ENSSSCT00000029853, ENSSSCT00000018780, ENSSSCT00000002918	1369	3	11368	8.30387	1	0.89467	52.5738
GOTERM_BP_DIRECT	GO:0072193~ureter smooth muscle cell differentiation	3	0.149031	0.0399371	ENSSSCT00000005561, ENSSSCT00000005607, ENSSSCT00000018780	1369	3	11368	8.30387	1	0.89467	52.5738
GOTERM_BP_DIRECT	GO:0010903~negative regulation of very-low-density lipoprotein particle remodeling	3	0.149031	0.0399371	ENSSSCT00000006964, ENSSSCT00000016435, ENSSSCT00000016436	1369	3	11368	8.30387	1	0.89467	52.5738
GOTERM_BP_DIRECT	GO:0050982~detection of mechanical stimulus	4	0.198708	0.0418946	ENSSSCT00000010093, ENSSSCT00000015928, ENSSSCT00000008812, ENSSSCT00000024435	1369	7	11368	4.74507	1	0.902358	54.3129
GOTERM_BP_DIRECT	GO:0086005~ventricular cardiac muscle cell action potential	4	0.198708	0.0418946	ENSSSCT00000009992, ENSSSCT00000011103, ENSSSCT00000007950, ENSSSCT00000007335	1369	7	11368	4.74507	1	0.902358	54.3129
GOTERM_BP_DIRECT	GO:0010759~positive regulation of macrophage chemotaxis	4	0.198708	0.0418946	ENSSSCT00000019290, ENSSSCT00000010899, ENSSSCT00000023238, ENSSSCT00000032689	1369	7	11368	4.74507	1	0.902358	54.3129
GOTERM_BP_DIRECT	GO:0015695~organic cation transport	4	0.198708	0.0418946	ENSSSCT00000001940, ENSSSCT00000002063, ENSSSCT00000029821, ENSSSCT00000015598	1369	7	11368	4.74507	1	0.902358	54.3129
GOTERM_BP_DIRECT	GO:0048762~mesenchymal cell differentiation	4	0.198708	0.0418946	ENSSSCT00000005922, ENSSSCT00000036612, ENSSSCT00000022448, ENSSSCT00000033224, ENSSSCT00000034224, ENSSSCT00000036589, ENSSSCT00000033114, ENSSSCT00000034595, ENSSSCT00000008212	1369	7	11368	4.74507	1	0.902358	54.3129
GOTERM_BP_DIRECT	GO:0042118~endothelial cell activation	4	0.198708	0.0418946	ENSSSCT00000005922, ENSSSCT00000036612, ENSSSCT00000022448, ENSSSCT00000023205, ENSSSCT00000034224, ENSSSCT00000033114, ENSSSCT00000005009, ENSSSCT00000018144, ENSSSCT00000036505	1369	7	11368	4.74507	1	0.902358	54.3129
GOTERM_BP_DIRECT	GO:0001759~organ induction	4	0.198708	0.0418946	ENSSSCT00000033224, ENSSSCT00000005607, ENSSSCT00000018382, ENSSSCT00000036589, ENSSSCT00000034595, ENSSSCT00000009949	1369	7	11368	4.74507	1	0.902358	54.3129
GOTERM_BP_DIRECT	GO:0071773~cellular response to BMP stimulus	4	0.198708	0.0418946	ENSSSCT00000001974, ENSSSCT00000004101, ENSSSCT00000008270, ENSSSCT00000023745	1369	7	11368	4.74507	1	0.902358	54.3129
GOTERM_BP_DIRECT	GO:0032233~positive regulation of actin filament bundle assembly	4	0.198708	0.0418946	ENSSSCT00000009142, ENSSSCT00000025236, ENSSSCT00000011276, ENSSSCT00000017637	1369	7	11368	4.74507	1	0.902358	54.3129
GOTERM_BP_DIRECT	GO:0034380~high-density lipoprotein particle assembly	4	0.198708	0.0418946	ENSSSCT00000006964, ENSSSCT00000016436, ENSSSCT00000003426, ENSSSCT00000001547	1369	7	11368	4.74507	1	0.902358	54.3129
GOTERM_BP_DIRECT	GO:0030818~negative regulation of cAMP biosynthetic process	4	0.198708	0.0418946	ENSSSCT00000009890, ENSSSCT00000004943, ENSSSCT00000016167, ENSSSCT00000031304	1369	7	11368	4.74507	1	0.902358	54.3129
GOTERM_BP_DIRECT	GO:0045746~negative regulation of Notch signaling pathway	6	0.298063	0.0449291	ENSSSCT00000004668, ENSSSCT00000007080, ENSSSCT00000011599, ENSSSCT00000006406, ENSSSCT00000025816, ENSSSCT00000008212	1369	17	11368	2.93078	1	0.914603	56.8901
GOTERM_BP_DIRECT	GO:0042476~odontogenesis	5	0.248385	0.0467382	ENSSSCT00000002175, ENSSSCT00000000226, ENSSSCT00000012032, ENSSSCT00000013387, ENSSSCT00000009999	1369	12	11368	3.45995	1	0.91979	58.3605
GOTERM_BP_DIRECT	GO:0019221~cytokine-mediated signaling pathway	20	0.993542	0.048038	ENSSSCT00000007750, ENSSSCT00000005664, ENSSSCT00000029636, ENSSSCT00000035115, ENSSSCT00000018948, ENSSSCT00000009679, ENSSSCT00000002687, ENSSSCT00000027504, ENSSSCT00000000771, ENSSSCT00000028619, ENSSSCT00000019290, ENSSSCT00000018369, ENSSSCT00000019488, ENSSSCT00000004594, ENSSSCT00000013956, ENSSSCT00000000999, ENSSSCT00000000994, ENSSSCT00000033060, ENSSSCT00000034816, ENSSSCT00000025554,…	1369	106	11368	1.56677	1	0.922408	59.3876
GOTERM_BP_DIRECT	GO:0045766~positive regulation of angiogenesis	14	0.695479	0.0486932	ENSSSCT00000036581, ENSSSCT00000000251, ENSSSCT00000034520, ENSSSCT00000019577, ENSSSCT00000016982, ENSSSCT00000036588, ENSSSCT00000004101, ENSSSCT00000015483, ENSSSCT00000036335, ENSSSCT00000005288, ENSSSCT00000005647, ENSSSCT00000027504, ENSSSCT00000018929, ENSSSCT00000023238, ENSSSCT00000003535, ENSSSCT00000005307, ENSSSCT00000006062, ENSSSCT00000009683	1369	66	11368	1.76143	1	0.922224	59.8962
GOTERM_BP_DIRECT	GO:0060395~SMAD protein signal transduction	11	0.546448	0.0498928	ENSSSCT00000012075, ENSSSCT00000013569, ENSSSCT00000005561, ENSSSCT00000011358, ENSSSCT00000031696, ENSSSCT00000010515, ENSSSCT00000005464, ENSSSCT00000010546, ENSSSCT00000009139, ENSSSCT00000010869, ENSSSCT00000008212	1369	47	11368	1.94346	1	0.924266	60.8118
GOTERM_BP_DIRECT	GO:0048565~digestive tract development	7	0.34774	0.0500337	ENSSSCT00000023255, ENSSSCT00000008812, ENSSSCT00000004101, ENSSSCT00000017459, ENSSSCT00000009679, ENSSSCT00000025039, ENSSSCT00000008270	1369	23	11368	2.52727	1	0.922	60.918
GOTERM_BP_DIRECT	GO:0001501~skeletal system development	10	0.496771	0.051397	ENSSSCT00000033299, ENSSSCT00000023723, ENSSSCT00000022487, ENSSSCT00000015441, ENSSSCT00000007094, ENSSSCT00000018780, ENSSSCT00000034111, ENSSSCT00000027193, ENSSSCT00000035607, ENSSSCT00000007335, ENSSSCT00000032588, ENSSSCT00000005143	1369	41	11368	2.02533	1	0.92464	61.9319
GOTERM_BP_DIRECT	GO:0048468~cell development	10	0.496771	0.051397	ENSSSCT00000030363, ENSSSCT00000023255, ENSSSCT00000005561, ENSSSCT00000011358, ENSSSCT00000031696, ENSSSCT00000004101, ENSSSCT00000008270, ENSSSCT00000010546, ENSSSCT00000009139, ENSSSCT00000008212	1369	41	11368	2.02533	1	0.92464	61.9319
GOTERM_BP_DIRECT	GO:0006508~proteolysis	19	0.943865	0.0514404	ENSSSCT00000016254, ENSSSCT00000002072, ENSSSCT00000029137, ENSSSCT00000014473, ENSSSCT00000011287, ENSSSCT00000004466, ENSSSCT00000018027, ENSSSCT00000013762, ENSSSCT00000026256, ENSSSCT00000015483, ENSSSCT00000015539, ENSSSCT00000034317, ENSSSCT00000013897, ENSSSCT00000001807, ENSSSCT00000026121, ENSSSCT00000026740, ENSSSCT00000014312, ENSSSCT00000011739, ENSSSCT00000007843, ENSSSCT00000035626,…	1369	100	11368	1.57774	1	0.922057	61.9638
GOTERM_BP_DIRECT	GO:0008344~adult locomotory behavior	9	0.447094	0.0522584	ENSSSCT00000027470, ENSSSCT00000023418, ENSSSCT00000031113, ENSSSCT00000017403, ENSSSCT00000029901, ENSSSCT00000006162, ENSSSCT00000019091, ENSSSCT00000014046, ENSSSCT00000035620	1369	35	11368	2.13528	1	0.922536	62.5597
GOTERM_BP_DIRECT	GO:0007179~transforming growth factor beta receptor signaling pathway	9	0.447094	0.0522584	ENSSSCT00000010634, ENSSSCT00000005922, ENSSSCT00000036612, ENSSSCT00000000251, ENSSSCT00000022448, ENSSSCT00000013569, ENSSSCT00000004275, ENSSSCT00000034224, ENSSSCT00000017459, ENSSSCT00000033114, ENSSSCT00000028241, ENSSSCT00000005464	1369	35	11368	2.13528	1	0.922536	62.5597
GOTERM_BP_DIRECT	GO:0034504~protein localization to nucleus	6	0.298063	0.0562525	ENSSSCT00000018039, ENSSSCT00000005088, ENSSSCT00000005561, ENSSSCT00000005607, ENSSSCT00000018780, ENSSSCT00000008212	1369	18	11368	2.76796	1	0.934252	65.3449
GOTERM_BP_DIRECT	GO:0045765~regulation of angiogenesis	6	0.298063	0.0562525	ENSSSCT00000017233, ENSSSCT00000016601, ENSSSCT00000016982, ENSSSCT00000006585, ENSSSCT00000012688, ENSSSCT00000018094	1369	18	11368	2.76796	1	0.934252	65.3449
GOTERM_BP_DIRECT	GO:0048286~lung alveolus development	6	0.298063	0.0562525	ENSSSCT00000018184, ENSSSCT00000018117, ENSSSCT00000005561, ENSSSCT00000034069, ENSSSCT00000009741, ENSSSCT00000008786	1369	18	11368	2.76796	1	0.934252	65.3449
GOTERM_BP_DIRECT	GO:0043524~negative regulation of neuron apoptotic process	14	0.695479	0.0597711	ENSSSCT00000000777, ENSSSCT00000005607, ENSSSCT00000014561, ENSSSCT00000012011, ENSSSCT00000032669, ENSSSCT00000034395, ENSSSCT00000029059, ENSSSCT00000019290, ENSSSCT00000013569, ENSSSCT00000010578, ENSSSCT00000003426, ENSSSCT00000015453, ENSSSCT00000013689, ENSSSCT00000035620, ENSSSCT00000001686, ENSSSCT00000033368	1369	68	11368	1.70962	1	0.942668	67.6351
GOTERM_BP_DIRECT	GO:0021987~cerebral cortex development	7	0.34774	0.0601776	ENSSSCT00000018039, ENSSSCT00000018117, ENSSSCT00000007727, ENSSSCT00000024678, ENSSSCT00000017459, ENSSSCT00000032503, ENSSSCT00000031816, ENSSSCT00000006141	1369	24	11368	2.42196	1	0.941637	67.8902
GOTERM_BP_DIRECT	GO:0030326~embryonic limb morphogenesis	7	0.34774	0.0601776	ENSSSCT00000029331, ENSSSCT00000033224, ENSSSCT00000005307, ENSSSCT00000009848, ENSSSCT00000033980, ENSSSCT00000036589, ENSSSCT00000034559, ENSSSCT00000034595, ENSSSCT00000034106, ENSSSCT00000007335, ENSSSCT00000010869, ENSSSCT00000008212	1369	24	11368	2.42196	1	0.941637	67.8902
GOTERM_BP_DIRECT	GO:0000187~activation of MAPK activity	9	0.447094	0.0603957	ENSSSCT00000010760, ENSSSCT00000034520, ENSSSCT00000000777, ENSSSCT00000031208, ENSSSCT00000018548, ENSSSCT00000018382, ENSSSCT00000000936, ENSSSCT00000005288, ENSSSCT00000009679, ENSSSCT00000014046	1369	36	11368	2.07597	1	0.940075	68.0263
GOTERM_BP_DIRECT	GO:0006954~inflammatory response	31	1.53999	0.0605428	ENSSSCT00000034178, ENSSSCT00000009807, ENSSSCT00000032865, ENSSSCT00000010760, ENSSSCT00000000262, ENSSSCT00000013077, ENSSSCT00000034158, ENSSSCT00000009679, ENSSSCT00000005288, ENSSSCT00000036631, ENSSSCT00000011016, ENSSSCT00000023238, ENSSSCT00000033904, ENSSSCT00000000771, ENSSSCT00000013375, ENSSSCT00000028399, ENSSSCT00000007029, ENSSSCT00000006062, ENSSSCT00000030022, ENSSSCT00000030552,…	1369	187	11368	1.37658	1	0.938306	68.1178
GOTERM_BP_DIRECT	GO:0048536~spleen development	8	0.397417	0.0611196	ENSSSCT00000006698, ENSSSCT00000005206, ENSSSCT00000006275, ENSSSCT00000017849, ENSSSCT00000018382, ENSSSCT00000009999, ENSSSCT00000002223, ENSSSCT00000011528	1369	30	11368	2.21437	1	0.937797	68.4742
GOTERM_BP_DIRECT	GO:0033700~phospholipid efflux	4	0.198708	0.061156	ENSSSCT00000006964, ENSSSCT00000016435, ENSSSCT00000016436, ENSSSCT00000003426	1369	8	11368	4.15194	1	0.935708	68.4966
GOTERM_BP_DIRECT	GO:0051145~smooth muscle cell differentiation	4	0.198708	0.061156	ENSSSCT00000015453, ENSSSCT00000002222, ENSSSCT00000018382, ENSSSCT00000008790	1369	8	11368	4.15194	1	0.935708	68.4966
GOTERM_BP_DIRECT	GO:0006956~complement activation	4	0.198708	0.061156	ENSSSCT00000035578, ENSSSCT00000006062, ENSSSCT00000001564, ENSSSCT00000033025, ENSSSCT00000012918	1369	8	11368	4.15194	1	0.935708	68.4966
GOTERM_BP_DIRECT	GO:0070986~left/right axis specification	4	0.198708	0.061156	ENSSSCT00000018039, ENSSSCT00000004605, ENSSSCT00000009999, ENSSSCT00000028161	1369	8	11368	4.15194	1	0.935708	68.4966
GOTERM_BP_DIRECT	GO:0009072~aromatic amino acid family metabolic process	4	0.198708	0.061156	ENSSSCT00000033132, ENSSSCT00000001995, ENSSSCT00000000934, ENSSSCT00000010747	1369	8	11368	4.15194	1	0.935708	68.4966
GOTERM_BP_DIRECT	GO:0048870~cell motility	4	0.198708	0.061156	ENSSSCT00000012861, ENSSSCT00000016601, ENSSSCT00000013649, ENSSSCT00000019494	1369	8	11368	4.15194	1	0.935708	68.4966
GOTERM_BP_DIRECT	GO:0007168~receptor guanylyl cyclase signaling pathway	4	0.198708	0.061156	ENSSSCT00000029871, ENSSSCT00000007200, ENSSSCT00000023671, ENSSSCT00000005861	1369	8	11368	4.15194	1	0.935708	68.4966
GOTERM_BP_DIRECT	GO:0051258~protein polymerization	4	0.198708	0.061156	ENSSSCT00000009854, ENSSSCT00000026223, ENSSSCT00000009855, ENSSSCT00000009856	1369	8	11368	4.15194	1	0.935708	68.4966
GOTERM_BP_DIRECT	GO:0030879~mammary gland development	4	0.198708	0.061156	ENSSSCT00000017403, ENSSSCT00000001593, ENSSSCT00000019090, ENSSSCT00000018780	1369	8	11368	4.15194	1	0.935708	68.4966
GOTERM_BP_DIRECT	GO:0006351~transcription, DNA-templated	45	2.23547	0.0612325	ENSSSCT00000000461, ENSSSCT00000015739, ENSSSCT00000003692, ENSSSCT00000009741, ENSSSCT00000013557, ENSSSCT00000002698, ENSSSCT00000000007, ENSSSCT00000036693, ENSSSCT00000012267, ENSSSCT00000031378, ENSSSCT00000014638, ENSSSCT00000023102, ENSSSCT00000005464, ENSSSCT00000015663, ENSSSCT00000031031, ENSSSCT00000008190, ENSSSCT00000004668, ENSSSCT00000015453, ENSSSCT00000017183, ENSSSCT00000009390,…	1369	290	11368	1.28853	1	0.933725	68.5435
GOTERM_BP_DIRECT	GO:0007605~sensory perception of sound	13	0.645802	0.0635556	ENSSSCT00000032235, ENSSSCT00000016229, ENSSSCT00000033224, ENSSSCT00000001911, ENSSSCT00000005607, ENSSSCT00000002020, ENSSSCT00000036589, ENSSSCT00000008599, ENSSSCT00000031304, ENSSSCT00000025934, ENSSSCT00000001032, ENSSSCT00000010673, ENSSSCT00000034595, ENSSSCT00000012277, ENSSSCT00000015931	1369	62	11368	1.74113	1	0.93833	69.9383
GOTERM_BP_DIRECT	GO:0001843~neural tube closure	11	0.546448	0.0636772	ENSSSCT00000029331, ENSSSCT00000003553, ENSSSCT00000009841, ENSSSCT00000027524, ENSSSCT00000009559, ENSSSCT00000005561, ENSSSCT00000007590, ENSSSCT00000035949, ENSSSCT00000000801, ENSSSCT00000028161, ENSSSCT00000006141	1369	49	11368	1.86413	1	0.936571	70.0097
GOTERM_BP_DIRECT	GO:0033344~cholesterol efflux	6	0.298063	0.0690628	ENSSSCT00000006964, ENSSSCT00000000279, ENSSSCT00000016435, ENSSSCT00000016436, ENSSSCT00000003426, ENSSSCT00000001547	1369	19	11368	2.62228	1	0.948384	73.0147
GOTERM_BP_DIRECT	GO:0016358~dendrite development	6	0.298063	0.0690628	ENSSSCT00000018484, ENSSSCT00000000516, ENSSSCT00000032386, ENSSSCT00000007009, ENSSSCT00000035620, ENSSSCT00000001686	1369	19	11368	2.62228	1	0.948384	73.0147
GOTERM_BP_DIRECT	GO:0042475~odontogenesis of dentin-containing tooth	8	0.397417	0.0710995	ENSSSCT00000018039, ENSSSCT00000005561, ENSSSCT00000018382, ENSSSCT00000017133, ENSSSCT00000034111, ENSSSCT00000011528, ENSSSCT00000010638, ENSSSCT00000008212	1369	31	11368	2.14293	1	0.951135	74.0751
GOTERM_BP_DIRECT	GO:0050731~positive regulation of peptidyl-tyrosine phosphorylation	8	0.397417	0.0710995	ENSSSCT00000018369, ENSSSCT00000006275, ENSSSCT00000000777, ENSSSCT00000023255, ENSSSCT00000006585, ENSSSCT00000018382, ENSSSCT00000007121, ENSSSCT00000000314	1369	31	11368	2.14293	1	0.951135	74.0751
GOTERM_BP_DIRECT	GO:0007420~brain development	11	0.546448	0.0714037	ENSSSCT00000029331, ENSSSCT00000023632, ENSSSCT00000007727, ENSSSCT00000013569, ENSSSCT00000034654, ENSSSCT00000010462, ENSSSCT00000035025, ENSSSCT00000031898, ENSSSCT00000035459, ENSSSCT00000033549, ENSSSCT00000000801, ENSSSCT00000028161, ENSSSCT00000025910	1369	50	11368	1.82685	1	0.950056	74.2301
GOTERM_BP_DIRECT	GO:0001657~ureteric bud development	7	0.34774	0.0714526	ENSSSCT00000033224, ENSSSCT00000023205, ENSSSCT00000005607, ENSSSCT00000009572, ENSSSCT00000036589, ENSSSCT00000005464, ENSSSCT00000034595, ENSSSCT00000018144, ENSSSCT00000009949, ENSSSCT00000008212	1369	25	11368	2.32508	1	0.948414	74.2549
GOTERM_BP_DIRECT	GO:0030514~negative regulation of BMP signaling pathway	7	0.34774	0.0714526	ENSSSCT00000007318, ENSSSCT00000006275, ENSSSCT00000023205, ENSSSCT00000022487, ENSSSCT00000009543, ENSSSCT00000005307, ENSSSCT00000011709, ENSSSCT00000018144	1369	25	11368	2.32508	1	0.948414	74.2549
GOTERM_BP_DIRECT	GO:0001933~negative regulation of protein phosphorylation	7	0.34774	0.0714526	ENSSSCT00000007708, ENSSSCT00000014517, ENSSSCT00000007068, ENSSSCT00000004956, ENSSSCT00000009572, ENSSSCT00000023042, ENSSSCT00000000849, ENSSSCT00000034624, ENSSSCT00000035901	1369	25	11368	2.32508	1	0.948414	74.2549
GOTERM_BP_DIRECT	GO:0034384~high-density lipoprotein particle clearance	3	0.149031	0.0735437	ENSSSCT00000006964, ENSSSCT00000003426, ENSSSCT00000001547	1369	4	11368	6.2279	1	0.951196	75.2957
GOTERM_BP_DIRECT	GO:0008211~glucocorticoid metabolic process	3	0.149031	0.0735437	ENSSSCT00000016436, ENSSSCT00000002749, ENSSSCT00000035620	1369	4	11368	6.2279	1	0.951196	75.2957
GOTERM_BP_DIRECT	GO:0043249~erythrocyte maturation	3	0.149031	0.0735437	ENSSSCT00000008413, ENSSSCT00000029853, ENSSSCT00000008738	1369	4	11368	6.2279	1	0.951196	75.2957
GOTERM_BP_DIRECT	GO:0055009~atrial cardiac muscle tissue morphogenesis	3	0.149031	0.0735437	ENSSSCT00000018104, ENSSSCT00000009999, ENSSSCT00000009139	1369	4	11368	6.2279	1	0.951196	75.2957
GOTERM_BP_DIRECT	GO:0006144~purine nucleobase metabolic process	3	0.149031	0.0735437	ENSSSCT00000024562, ENSSSCT00000001159, ENSSSCT00000024132	1369	4	11368	6.2279	1	0.951196	75.2957
GOTERM_BP_DIRECT	GO:2001046~positive regulation of integrin-mediated signaling pathway	3	0.149031	0.0735437	ENSSSCT00000017273, ENSSSCT00000034881, ENSSSCT00000010536	1369	4	11368	6.2279	1	0.951196	75.2957
GOTERM_BP_DIRECT	GO:1900747~negative regulation of vascular endothelial growth factor signaling pathway	3	0.149031	0.0735437	ENSSSCT00000000999, ENSSSCT00000017233, ENSSSCT00000012913	1369	4	11368	6.2279	1	0.951196	75.2957
GOTERM_BP_DIRECT	GO:0019740~nitrogen utilization	3	0.149031	0.0735437	ENSSSCT00000001940, ENSSSCT00000002063, ENSSSCT00000029821	1369	4	11368	6.2279	1	0.951196	75.2957
GOTERM_BP_DIRECT	GO:0031659~positive regulation of cyclin-dependent protein serine/threonine kinase activity involved in G1/S transition of mitotic cell cycle	3	0.149031	0.0735437	ENSSSCT00000010093, ENSSSCT00000008812, ENSSSCT00000018382	1369	4	11368	6.2279	1	0.951196	75.2957
GOTERM_BP_DIRECT	GO:0001845~phagolysosome assembly	3	0.149031	0.0735437	ENSSSCT00000013380, ENSSSCT00000010760, ENSSSCT00000016229, ENSSSCT00000036512	1369	4	11368	6.2279	1	0.951196	75.2957
GOTERM_BP_DIRECT	GO:0007044~cell-substrate junction assembly	3	0.149031	0.0735437	ENSSSCT00000018842, ENSSSCT00000032798, ENSSSCT00000000314, ENSSSCT00000017610	1369	4	11368	6.2279	1	0.951196	75.2957
GOTERM_BP_DIRECT	GO:0006900~membrane budding	3	0.149031	0.0735437	ENSSSCT00000034189, ENSSSCT00000010760, ENSSSCT00000034155	1369	4	11368	6.2279	1	0.951196	75.2957
GOTERM_BP_DIRECT	GO:0031133~regulation of axon diameter	3	0.149031	0.0735437	ENSSSCT00000017936, ENSSSCT00000010578, ENSSSCT00000025659	1369	4	11368	6.2279	1	0.951196	75.2957
GOTERM_BP_DIRECT	GO:0060219~camera-type eye photoreceptor cell differentiation	3	0.149031	0.0735437	ENSSSCT00000018773, ENSSSCT00000035049, ENSSSCT00000002697, ENSSSCT00000009568	1369	4	11368	6.2279	1	0.951196	75.2957
GOTERM_BP_DIRECT	GO:0016485~protein processing	10	0.496771	0.0752928	ENSSSCT00000029331, ENSSSCT00000010760, ENSSSCT00000011882, ENSSSCT00000011229, ENSSSCT00000005046, ENSSSCT00000028161, ENSSSCT00000022836, ENSSSCT00000008766, ENSSSCT00000003903, ENSSSCT00000018236	1369	44	11368	1.88724	1	0.953107	76.1356
GOTERM_BP_DIRECT	GO:0016477~cell migration	17	0.844511	0.0756773	ENSSSCT00000034686, ENSSSCT00000009203, ENSSSCT00000035682, ENSSSCT00000034520, ENSSSCT00000033248, ENSSSCT00000018037, ENSSSCT00000004884, ENSSSCT00000023594, ENSSSCT00000013301, ENSSSCT00000005288, ENSSSCT00000018018, ENSSSCT00000002094, ENSSSCT00000015525, ENSSSCT00000006679, ENSSSCT00000032254, ENSSSCT00000032652, ENSSSCT00000018184, ENSSSCT00000035294, ENSSSCT00000035792, ENSSSCT00000033778,…	1369	91	11368	1.55127	1	0.952259	76.3166
GOTERM_BP_DIRECT	GO:0042127~regulation of cell proliferation	21	1.04322	0.0757258	ENSSSCT00000013276, ENSSSCT00000009203, ENSSSCT00000009807, ENSSSCT00000006275, ENSSSCT00000000262, ENSSSCT00000011287, ENSSSCT00000023943, ENSSSCT00000004884, ENSSSCT00000036631, ENSSSCT00000035409, ENSSSCT00000011528, ENSSSCT00000032254, ENSSSCT00000000771, ENSSSCT00000007738, ENSSSCT00000010093, ENSSSCT00000003972, ENSSSCT00000029853, ENSSSCT00000028399, ENSSSCT00000035136, ENSSSCT00000033606,…	1369	119	11368	1.46539	1	0.950735	76.3393
GOTERM_BP_DIRECT	GO:0008277~regulation of G-protein coupled receptor protein signaling pathway	5	0.248385	0.0778967	ENSSSCT00000007727, ENSSSCT00000002020, ENSSSCT00000000801, ENSSSCT00000018929, ENSSSCT00000011824	1369	14	11368	2.96567	1	0.953427	77.3361
GOTERM_BP_DIRECT	GO:0032331~negative regulation of chondrocyte differentiation	5	0.248385	0.0778967	ENSSSCT00000001974, ENSSSCT00000005307, ENSSSCT00000005561, ENSSSCT00000017133, ENSSSCT00000018780	1369	14	11368	2.96567	1	0.953427	77.3361
GOTERM_BP_DIRECT	GO:0090103~cochlea morphogenesis	5	0.248385	0.0778967	ENSSSCT00000031113, ENSSSCT00000005607, ENSSSCT00000017133, ENSSSCT00000018780, ENSSSCT00000017441	1369	14	11368	2.96567	1	0.953427	77.3361
GOTERM_BP_DIRECT	GO:0010575~positive regulation of vascular endothelial growth factor production	5	0.248385	0.0778967	ENSSSCT00000010116, ENSSSCT00000008161, ENSSSCT00000006062, ENSSSCT00000023238, ENSSSCT00000034765, ENSSSCT00000007282	1369	14	11368	2.96567	1	0.953427	77.3361
GOTERM_BP_DIRECT	GO:0007274~neuromuscular synaptic transmission	6	0.298063	0.0833404	ENSSSCT00000010557, ENSSSCT00000010597, ENSSSCT00000015727, ENSSSCT00000029069, ENSSSCT00000010673, ENSSSCT00000003773	1369	20	11368	2.49116	1	0.961429	79.6639
GOTERM_BP_DIRECT	GO:0086091~regulation of heart rate by cardiac conduction	6	0.298063	0.0833404	ENSSSCT00000012084, ENSSSCT00000019117, ENSSSCT00000009992, ENSSSCT00000016777, ENSSSCT00000013181, ENSSSCT00000007335	1369	20	11368	2.49116	1	0.961429	79.6639
GOTERM_BP_DIRECT	GO:0048873~homeostasis of number of cells within a tissue	6	0.298063	0.0833404	ENSSSCT00000018039, ENSSSCT00000010760, ENSSSCT00000023255, ENSSSCT00000006755, ENSSSCT00000025385, ENSSSCT00000011436	1369	20	11368	2.49116	1	0.961429	79.6639
GOTERM_BP_DIRECT	GO:0032924~activin receptor signaling pathway	4	0.198708	0.0837519	ENSSSCT00000005922, ENSSSCT00000036612, ENSSSCT00000022448, ENSSSCT00000007318, ENSSSCT00000034224, ENSSSCT00000033114, ENSSSCT00000009139	1369	9	11368	3.69061	1	0.960728	79.8304
GOTERM_BP_DIRECT	GO:0046579~positive regulation of Ras protein signal transduction	4	0.198708	0.0837519	ENSSSCT00000008413, ENSSSCT00000007349, ENSSSCT00000018382, ENSSSCT00000000936	1369	9	11368	3.69061	1	0.960728	79.8304
GOTERM_BP_DIRECT	GO:0046470~phosphatidylcholine metabolic process	4	0.198708	0.0837519	ENSSSCT00000029031, ENSSSCT00000016436, ENSSSCT00000031208, ENSSSCT00000035620	1369	9	11368	3.69061	1	0.960728	79.8304
GOTERM_BP_DIRECT	GO:0060307~regulation of ventricular cardiac muscle cell membrane repolarization	4	0.198708	0.0837519	ENSSSCT00000009992, ENSSSCT00000016777, ENSSSCT00000007950, ENSSSCT00000007335	1369	9	11368	3.69061	1	0.960728	79.8304
GOTERM_BP_DIRECT	GO:0008589~regulation of smoothened signaling pathway	4	0.198708	0.0837519	ENSSSCT00000010769, ENSSSCT00000008789, ENSSSCT00000018382, ENSSSCT00000017133	1369	9	11368	3.69061	1	0.960728	79.8304
GOTERM_BP_DIRECT	GO:0042572~retinol metabolic process	4	0.198708	0.0837519	ENSSSCT00000024562, ENSSSCT00000009852, ENSSSCT00000012769, ENSSSCT00000011467	1369	9	11368	3.69061	1	0.960728	79.8304
GOTERM_BP_DIRECT	GO:0043407~negative regulation of MAP kinase activity	7	0.34774	0.083854	ENSSSCT00000005561, ENSSSCT00000003426, ENSSSCT00000015978, ENSSSCT00000035165, ENSSSCT00000015336, ENSSSCT00000009949, ENSSSCT00000008212	1369	26	11368	2.23566	1	0.959532	79.8715
GOTERM_BP_DIRECT	GO:0006936~muscle contraction	7	0.34774	0.083854	ENSSSCT00000027470, ENSSSCT00000004091, ENSSSCT00000030689, ENSSSCT00000031119, ENSSSCT00000027194, ENSSSCT00000003285, ENSSSCT00000018141, ENSSSCT00000000418	1369	26	11368	2.23566	1	0.959532	79.8715
GOTERM_BP_DIRECT	GO:0030509~BMP signaling pathway	10	0.496771	0.0845518	ENSSSCT00000007318, ENSSSCT00000017849, ENSSSCT00000011358, ENSSSCT00000011103, ENSSSCT00000031696, ENSSSCT00000010515, ENSSSCT00000015663, ENSSSCT00000010546, ENSSSCT00000009139, ENSSSCT00000008212	1369	45	11368	1.8453	1	0.959297	80.1503
GOTERM_BP_DIRECT	GO:0030154~cell differentiation	21	1.04322	0.0866661	ENSSSCT00000006275, ENSSSCT00000014457, ENSSSCT00000004884, ENSSSCT00000002698, ENSSSCT00000035626, ENSSSCT00000017154, ENSSSCT00000034768, ENSSSCT00000034111, ENSSSCT00000034765, ENSSSCT00000002072, ENSSSCT00000016601, ENSSSCT00000027848, ENSSSCT00000023594, ENSSSCT00000004562, ENSSSCT00000034317, ENSSSCT00000010777, ENSSSCT00000014853, ENSSSCT00000003972, ENSSSCT00000007349, ENSSSCT00000025934,…	1369	121	11368	1.44117	1	0.961279	80.9728
GOTERM_BP_DIRECT	GO:0090090~negative regulation of canonical Wnt signaling pathway	11	0.546448	0.0885563	ENSSSCT00000023724, ENSSSCT00000014641, ENSSSCT00000011170, ENSSSCT00000013862, ENSSSCT00000005307, ENSSSCT00000010515, ENSSSCT00000018780, ENSSSCT00000019555, ENSSSCT00000015663, ENSSSCT00000017441, ENSSSCT00000011519	1369	52	11368	1.75659	1	0.962811	81.6808
GOTERM_BP_DIRECT	GO:0006935~chemotaxis	9	0.447094	0.0893386	ENSSSCT00000010899, ENSSSCT00000006585, ENSSSCT00000028611, ENSSSCT00000030552, ENSSSCT00000027411, ENSSSCT00000023238, ENSSSCT00000017775, ENSSSCT00000033097, ENSSSCT00000036482	1369	39	11368	1.91628	1	0.962697	81.9665
GOTERM_BP_DIRECT	GO:0045666~positive regulation of neuron differentiation	9	0.447094	0.0893386	ENSSSCT00000019166, ENSSSCT00000005561, ENSSSCT00000015453, ENSSSCT00000017133, ENSSSCT00000005009, ENSSSCT00000017406, ENSSSCT00000023745, ENSSSCT00000016902, ENSSSCT00000009390, ENSSSCT00000036505	1369	39	11368	1.91628	1	0.962697	81.9665
GOTERM_BP_DIRECT	GO:0046426~negative regulation of JAK-STAT cascade	8	0.397417	0.0937822	ENSSSCT00000007750, ENSSSCT00000019488, ENSSSCT00000000999, ENSSSCT00000029636, ENSSSCT00000013956, ENSSSCT00000000994, ENSSSCT00000035115, ENSSSCT00000034816, ENSSSCT00000014510, ENSSSCT00000002687	1369	33	11368	2.01306	1	0.967482	83.5109
GOTERM_BP_DIRECT	GO:0035690~cellular response to drug	8	0.397417	0.0937822	ENSSSCT00000007708, ENSSSCT00000026225, ENSSSCT00000019211, ENSSSCT00000015453, ENSSSCT00000004943, ENSSSCT00000036513, ENSSSCT00000016167, ENSSSCT00000023159	1369	33	11368	2.01306	1	0.967482	83.5109
GOTERM_BP_DIRECT	GO:0030335~positive regulation of cell migration	15	0.745156	0.0950955	ENSSSCT00000034686, ENSSSCT00000035682, ENSSSCT00000000777, ENSSSCT00000011287, ENSSSCT00000012478, ENSSSCT00000034158, ENSSSCT00000018018, ENSSSCT00000017637, ENSSSCT00000008978, ENSSSCT00000026339, ENSSSCT00000035294, ENSSSCT00000034895, ENSSSCT00000014254, ENSSSCT00000003972, ENSSSCT00000005149, ENSSSCT00000010515, ENSSSCT00000023302, ENSSSCT00000012520, ENSSSCT00000009048	1369	80	11368	1.55698	1	0.967999	83.9429
GOTERM_BP_DIRECT	GO:0055114~oxidation-reduction process	23	1.14257	0.0959983	ENSSSCT00000015550, ENSSSCT00000013404, ENSSSCT00000010894, ENSSSCT00000012231, ENSSSCT00000011600, ENSSSCT00000010600, ENSSSCT00000028863, ENSSSCT00000001195, ENSSSCT00000034660, ENSSSCT00000032127, ENSSSCT00000024887, ENSSSCT00000035614, ENSSSCT00000003508, ENSSSCT00000033745, ENSSSCT00000032489, ENSSSCT00000013375, ENSSSCT00000030677, ENSSSCT00000007358, ENSSSCT00000010747, ENSSSCT00000011435,…	1369	137	11368	1.39408	1	0.968009	84.2336
GOTERM_BP_DIRECT	GO:0008544~epidermis development	5	0.248385	0.0965134	ENSSSCT00000003811, ENSSSCT00000000007, ENSSSCT00000035764, ENSSSCT00000012267, ENSSSCT00000028161	1369	15	11368	2.76796	1	0.967552	84.3972
GOTERM_BP_DIRECT	GO:0045453~bone resorption	5	0.248385	0.0965134	ENSSSCT00000012401, ENSSSCT00000016284, ENSSSCT00000006755, ENSSSCT00000033431, ENSSSCT00000026121, ENSSSCT00000010869	1369	15	11368	2.76796	1	0.967552	84.3972
GOTERM_BP_DIRECT	GO:0007276~gamete generation	5	0.248385	0.0965134	ENSSSCT00000022594, ENSSSCT00000022735, ENSSSCT00000025021, ENSSSCT00000024221, ENSSSCT00000013513	1369	15	11368	2.76796	1	0.967552	84.3972
GOTERM_BP_DIRECT	GO:0007368~determination of left/right symmetry	6	0.298063	0.0990438	ENSSSCT00000001775, ENSSSCT00000009559, ENSSSCT00000011170, ENSSSCT00000008789, ENSSSCT00000018382, ENSSSCT00000009999	1369	21	11368	2.37253	1	0.969468	85.178
GOTERM_BP_DIRECT	GO:0010595~positive regulation of endothelial cell migration	6	0.298063	0.0990438	ENSSSCT00000036581, ENSSSCT00000017233, ENSSSCT00000016601, ENSSSCT00000005561, ENSSSCT00000019240, ENSSSCT00000005647, ENSSSCT00000034069	1369	21	11368	2.37253	1	0.969468	85.178
GOTERM_BP_DIRECT	GO:0045931~positive regulation of mitotic cell cycle	6	0.298063	0.0990438	ENSSSCT00000006275, ENSSSCT00000029853, ENSSSCT00000026225, ENSSSCT00000018382, ENSSSCT00000018948, ENSSSCT00000007824	1369	21	11368	2.37253	1	0.969468	85.178
GOTERM_BP_DIRECT	GO:0006898~receptor-mediated endocytosis	6	0.298063	0.0990438	ENSSSCT00000035897, ENSSSCT00000017297, ENSSSCT00000004213, ENSSSCT00000003426, ENSSSCT00000029971, ENSSSCT00000033269, ENSSSCT00000002803, ENSSSCT00000012082	1369	21	11368	2.37253	1	0.969468	85.178
GOTERM_BP_DIRECT	GO:0032956~regulation of actin cytoskeleton organization	6	0.298063	0.0990438	ENSSSCT00000018842, ENSSSCT00000009203, ENSSSCT00000034606, ENSSSCT00000013265, ENSSSCT00000006275, ENSSSCT00000012913, ENSSSCT00000032798, ENSSSCT00000032254, ENSSSCT00000010536	1369	21	11368	2.37253	1	0.969468	85.178
